# Supplementary material for: Chemistry of CS2 and CS3 Bridged Decaborane Analogues: Regular Coordination Versus Cluster Expansion
Source: MDPI journal article supplement (doi:10.3390/molecules28030998), 2023-01-19

## checkCIF/PLATON report

Structure factors have been supplied for datablock(s) shelx

THIS REPORT IS FOR GUIDANCE ONLY. IF USED AS PART OF A REVIEW PROCEDURE FOR PUBLICATION, IT SHOULD NOT REPLACE THE EXPERTISE OF AN EXPERIENCED CRYSTALLOGRAPHIC REFEREE.

No syntax errors found.      CIF dictionary      Interpreting this report

### Datablock: shelx

---

Bond precision:      C-C = 0.0070 Å      Wavelength=0.71073

Cell:                      a=12.4725 (4)                      b=14.4351 (5)                      c=16.0368 (5)  
                              alpha=88.707 (1)                      beta=74.736 (1)                      gamma=79.911 (1)  
Temperature:              297 K

|                        | Calculated                               | Reported                                 |
|------------------------|------------------------------------------|------------------------------------------|
| Volume                 | 2741.52 (16)                             | 2741.52 (16)                             |
| Space group            | P -1                                     | P -1                                     |
| Hall group             | -P 1                                     | -P 1                                     |
| Moiety formula         | C33 H34 B6 Co6 O13 Rh2 S5<br>[+ solvent] | C33 H34 B6 Co6 O13 Rh2 S5<br>[+ solvent] |
| Sum formula            | C33 H34 B6 Co6 O13 Rh2 S5<br>[+ solvent] | C33 H34 B6 Co6 O13 Rh2 S5                |
| Mr                     | 1423.16                                  | 1423.16                                  |
| Dx, g cm <sup>-3</sup> | 1.724                                    | 1.724                                    |
| Z                      | 2                                        | 2                                        |
| Mu (mm <sup>-1</sup> ) | 2.594                                    | 2.594                                    |
| F000                   | 1396.0                                   | 1396.0                                   |
| F000'                  | 1397.35                                  |                                          |
| h, k, lmax             | 16, 19, 21                               | 16, 19, 21                               |
| Nref                   | 13235                                    | 13201                                    |
| Tmin, Tmax             | 0.740, 0.949                             | 0.622, 0.747                             |
| Tmin'                  | 0.725                                    |                                          |

Correction method= # Reported T Limits: Tmin=0.622 Tmax=0.747

AbsCorr = MULTI-SCAN

Data completeness= 0.997

Theta(max)= 28.000

R(reflections)= 0.0295( 10147)

wR2(reflections)=  
0.0764( 13201)

S = 1.049

Npar= 596

The following ALERTS were generated. Each ALERT has the format

**test-name\_ALERT\_alert-type\_alert-level.**

Click on the hyperlinks for more details of the test.

---

### Alert level B

PLAT910\_ALERT\_3\_B Missing # of FCF Reflection(s) Below Theta(Min).

25 Note

**Author Response: These are outlier reflections which are omitted from refinement**

---

### Alert level C

|                                                                    |                                 |               |
|--------------------------------------------------------------------|---------------------------------|---------------|
| PLAT213_ALERT_2_C Atom C6                                          | has ADP max/min Ratio .....     | 3.3 prolat    |
| PLAT213_ALERT_2_C Atom C8                                          | has ADP max/min Ratio .....     | 3.6 prolat    |
| PLAT213_ALERT_2_C Atom C9                                          | has ADP max/min Ratio .....     | 3.7 prolat    |
| PLAT213_ALERT_2_C Atom C10                                         | has ADP max/min Ratio .....     | 3.5 prolat    |
| PLAT220_ALERT_2_C NonSolvent Resd 1 C                              | Ueq(max)/Ueq(min) Range         | 5.9 Ratio     |
| PLAT222_ALERT_3_C NonSolvent Resd 1 H                              | Uiso(max)/Uiso(min) Range       | 9.1 Ratio     |
| PLAT242_ALERT_2_C Low 'MainMol'                                    | Ueq as Compared to Neighbors of | Rh1 Check     |
| PLAT242_ALERT_2_C Low 'MainMol'                                    | Ueq as Compared to Neighbors of | C1 Check      |
| PLAT242_ALERT_2_C Low 'MainMol'                                    | Ueq as Compared to Neighbors of | C2 Check      |
| PLAT242_ALERT_2_C Low 'MainMol'                                    | Ueq as Compared to Neighbors of | C3 Check      |
| PLAT242_ALERT_2_C Low 'MainMol'                                    | Ueq as Compared to Neighbors of | C4 Check      |
| PLAT242_ALERT_2_C Low 'MainMol'                                    | Ueq as Compared to Neighbors of | C5 Check      |
| PLAT905_ALERT_3_C Negative K value in the Analysis of Variance ... |                                 | -1.052 Report |
| PLAT911_ALERT_3_C Missing FCF Refl Between Thmin & STh/L= 0.600    |                                 | 8 Report      |
| PLAT913_ALERT_3_C Missing # of Very Strong Reflections in FCF .... |                                 | 4 Note        |

---

### Alert level G

|                                                                    |              |
|--------------------------------------------------------------------|--------------|
| PLAT154_ALERT_1_G The s.u.'s on the Cell Angles are Equal ..(Note) | 0.001 Degree |
| PLAT187_ALERT_4_G The CIF-Embedded .res File Contains RIGU Records | 2 Report     |
| PLAT230_ALERT_2_G Hirshfeld Test Diff for O11 --C21 .              | 5.5 s.u.     |
| PLAT232_ALERT_2_G Hirshfeld Test Diff (M-X) Rh2 --S2 .             | 5.2 s.u.     |
| PLAT232_ALERT_2_G Hirshfeld Test Diff (M-X) Co1 --C21 .            | 7.9 s.u.     |
| PLAT232_ALERT_2_G Hirshfeld Test Diff (M-X) Co5 --C23 .            | 6.0 s.u.     |
| PLAT232_ALERT_2_G Hirshfeld Test Diff (M-X) Co6 --C22 .            | 6.0 s.u.     |
| PLAT343_ALERT_2_G Unusual sp? Angle Range in Main Residue for      | C28 Check    |
| PLAT606_ALERT_4_G Solvent Accessible VOID(S) in Structure .....    | ! Info       |
| PLAT794_ALERT_5_G Tentative Bond Valency for Co1 (III) .           | 2.28 Info    |
| PLAT794_ALERT_5_G Tentative Bond Valency for Co2 (III) .           | 2.25 Info    |
| PLAT794_ALERT_5_G Tentative Bond Valency for Co3 (III) .           | 2.56 Info    |
| PLAT794_ALERT_5_G Tentative Bond Valency for Co5 (III) .           | 2.60 Info    |
| PLAT794_ALERT_5_G Tentative Bond Valency for Co6 (III) .           | 2.30 Info    |
| PLAT794_ALERT_5_G Tentative Bond Valency for Co7 (III) .           | 2.39 Info    |
| PLAT860_ALERT_3_G Number of Least-Squares Restraints .....         | 150 Note     |
| PLAT869_ALERT_4_G ALERTS Related to the Use of SQUEEZE Suppressed  | ! Info       |
| PLAT883_ALERT_1_G No Info/Value for _atom_sites_solution_primary . | Please Do !  |

|                                                                    |             |
|--------------------------------------------------------------------|-------------|
| PLAT912_ALERT_4_G Missing # of FCF Reflections Above STh/L= 0.600  | 1 Note      |
| PLAT933_ALERT_2_G Number of HKL-OMIT Records in Embedded .res File | 23 Note     |
| PLAT967_ALERT_5_G Note: Two-Theta Cutoff Value in Embedded .res .. | 56.0 Degree |
| PLAT978_ALERT_2_G Number C-C Bonds with Positive Residual Density. | 3 Info      |

---

0 **ALERT level A** = Most likely a serious problem - resolve or explain  
 1 **ALERT level B** = A potentially serious problem, consider carefully  
 15 **ALERT level C** = Check. Ensure it is not caused by an omission or oversight  
 22 **ALERT level G** = General information/check it is not something unexpected

2 ALERT type 1 CIF construction/syntax error, inconsistent or missing data  
 19 ALERT type 2 Indicator that the structure model may be wrong or deficient  
 6 ALERT type 3 Indicator that the structure quality may be low  
 4 ALERT type 4 Improvement, methodology, query or suggestion  
 7 ALERT type 5 Informative message, check

---

It is advisable to attempt to resolve as many as possible of the alerts in all categories. Often the minor alerts point to easily fixed oversights, errors and omissions in your CIF or refinement strategy, so attention to these fine details can be worthwhile. In order to resolve some of the more serious problems it may be necessary to carry out additional measurements or structure refinements. However, the purpose of your study may justify the reported deviations and the more serious of these should normally be commented upon in the discussion or experimental section of a paper or in the "special\_details" fields of the CIF. checkCIF was carefully designed to identify outliers and unusual parameters, but every test has its limitations and alerts that are not important in a particular case may appear. Conversely, the absence of alerts does not guarantee there are no aspects of the results needing attention. It is up to the individual to critically assess their own results and, if necessary, seek expert advice.

### Publication of your CIF in IUCr journals

A basic structural check has been run on your CIF. These basic checks will be run on all CIFs submitted for publication in IUCr journals (*Acta Crystallographica*, *Journal of Applied Crystallography*, *Journal of Synchrotron Radiation*); however, if you intend to submit to *Acta Crystallographica Section C* or *E* or *IUCrData*, you should make sure that full publication checks are run on the final version of your CIF prior to submission.

### Publication of your CIF in other journals

Please refer to the *Notes for Authors* of the relevant journal for any special instructions relating to CIF submission.

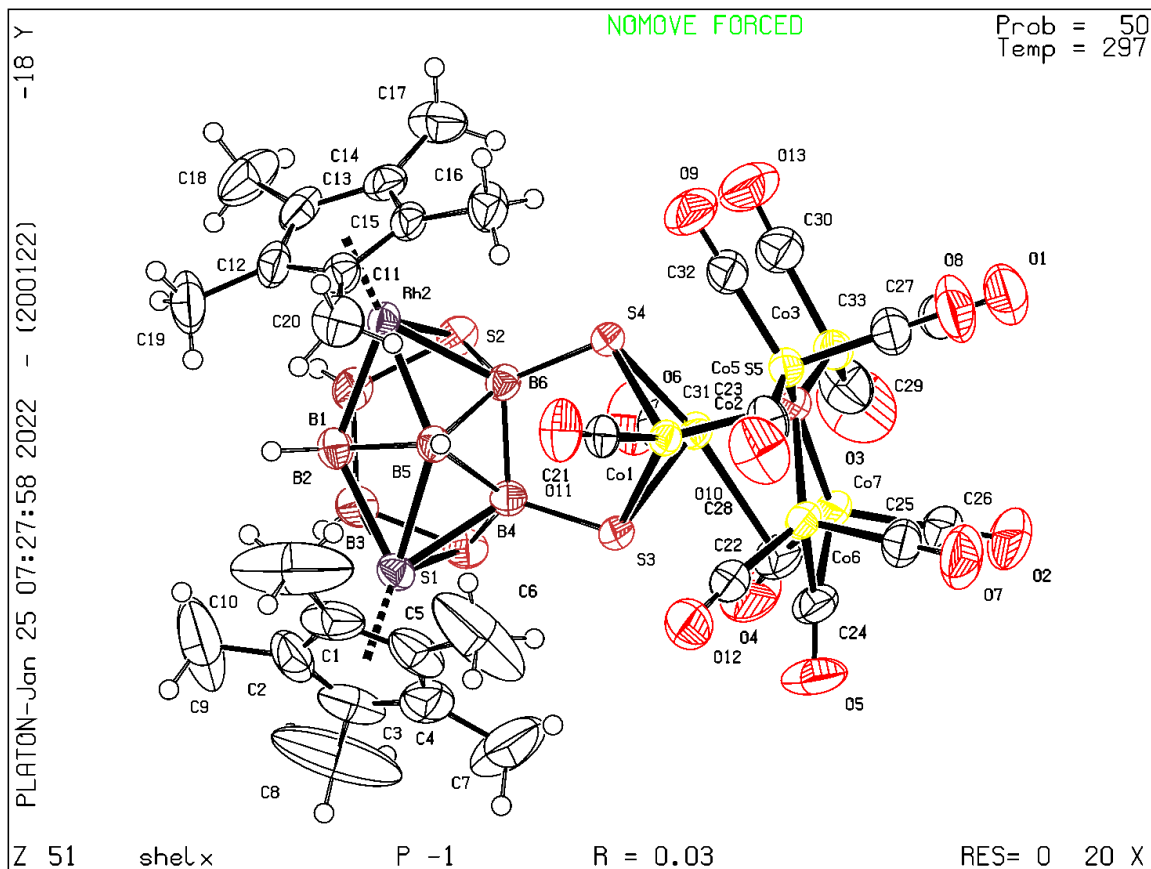

Supplement: s1 [file s1]
