# Supplementary material for: Chemistry of CS2 and CS3 Bridged Decaborane Analogues: Regular Coordination Versus Cluster Expansion
Source: MDPI journal article supplement (doi:10.3390/molecules28030998), 2023-01-19
Supplement: s1 [file s1]

---

The following ALERTS were generated. Each ALERT has the format

**test-name\_ALERT\_alert-type\_alert-level.**

Click on the hyperlinks for more details of the test.

---

 **Alert level B**

|                   |            |        |   |                   |       |     |       |
|-------------------|------------|--------|---|-------------------|-------|-----|-------|
| PLAT220_ALERT_2_B | NonSolvent | Resd 1 | C | Ueq(max)/Ueq(min) | Range | 7.4 | Ratio |
|-------------------|------------|--------|---|-------------------|-------|-----|-------|

---

 **Alert level C**

|                   |                                           |                          |                                 |                     |       |        |        |
|-------------------|-------------------------------------------|--------------------------|---------------------------------|---------------------|-------|--------|--------|
| PLAT222_ALERT_3_C | NonSolvent                                | Resd 1                   | H                               | Uiso(max)/Uiso(min) | Range | 7.1    | Ratio  |
| PLAT242_ALERT_2_C | Low                                       | 'MainMol'                | Ueq as Compared to Neighbors of |                     |       | Mol    | Check  |
| PLAT260_ALERT_2_C | Large Average                             | Ueq of Residue Including |                                 | C11                 |       | 0.153  | Check  |
| PLAT260_ALERT_2_C | Large Average                             | Ueq of Residue Including |                                 | C11C                |       | 0.153  | Check  |
| PLAT303_ALERT_2_C | Full Occupancy                            | Atom H19B                | with #                          | Connections         |       | 1.20   | Check  |
| PLAT342_ALERT_3_C | Low Bond Precision on                     | C-C Bonds                | .....                           |                     |       | 0.0083 | Ang.   |
| PLAT906_ALERT_3_C | Large K Value in the Analysis of Variance | .....                    |                                 |                     |       | 2.450  | Check  |
| PLAT911_ALERT_3_C | Missing FCF Refl Between Thmin & STh/L=   | 0.600                    |                                 |                     |       | 9      | Report |
| PLAT971_ALERT_2_C | Check Calcd Resid. Dens.                  | 0.45A                    | From                            | Mol                 |       | 2.12   | eA-3   |
| PLAT971_ALERT_2_C | Check Calcd Resid. Dens.                  | 0.30A                    | From                            | Mol                 |       | 2.00   | eA-3   |
| PLAT971_ALERT_2_C | Check Calcd Resid. Dens.                  | 0.36A                    | From                            | Mol                 |       | 1.96   | eA-3   |
| PLAT971_ALERT_2_C | Check Calcd Resid. Dens.                  | 0.33A                    | From                            | C11C                |       | 1.84   | eA-3   |
| PLAT972_ALERT_2_C | Check Calcd Resid. Dens.                  | 0.56A                    | From                            | C12C                |       | -1.67  | eA-3   |
| PLAT972_ALERT_2_C | Check Calcd Resid. Dens.                  | 0.53A                    | From                            | C12C                |       | -1.67  | eA-3   |
| PLAT972_ALERT_2_C | Check Calcd Resid. Dens.                  | 0.67A                    | From                            | C11C                |       | -1.57  | eA-3   |
| PLAT972_ALERT_2_C | Check Calcd Resid. Dens.                  | 0.07A                    | From                            | C11B                |       | -1.54  | eA-3   |

---

 **Alert level G**

|                   |                                                  |                |             |     |   |        |        |
|-------------------|--------------------------------------------------|----------------|-------------|-----|---|--------|--------|
| PLAT002_ALERT_2_G | Number of Distance or Angle Restraints on AtSite |                |             |     |   | 9      | Note   |
| PLAT003_ALERT_2_G | Number of Uiso or Uij Restrained non-H Atoms ... |                |             |     |   | 9      | Report |
| PLAT004_ALERT_5_G | Polymeric Structure Found with Maximum Dimension |                |             |     |   | 2      | Info   |
| PLAT042_ALERT_1_G | Calc. and Reported Moiety Formula Strings Differ |                |             |     |   | Please | Check  |
| PLAT083_ALERT_2_G | SHELXL Second Parameter in WGHT Unusually Large  |                |             |     |   | 25.51  | Why ?  |
| PLAT171_ALERT_4_G | The CIF-Embedded .res File Contains EADP Records |                |             |     |   | 1      | Report |
| PLAT172_ALERT_4_G | The CIF-Embedded .res File Contains DFIX Records |                |             |     |   | 2      | Report |
| PLAT186_ALERT_4_G | The CIF-Embedded .res File Contains ISOR Records |                |             |     |   | 1      | Report |
| PLAT230_ALERT_2_G | Hirshfeld Test Diff for                          | C11B           | --O3_b      | .   |   | 15.5   | s.u.   |
| PLAT232_ALERT_2_G | Hirshfeld Test Diff (M-X)                        | Mol            | --S5        | .   |   | 11.6   | s.u.   |
| PLAT232_ALERT_2_G | Hirshfeld Test Diff (M-X)                        | Mol            | --C22       | .   |   | 6.7    | s.u.   |
| PLAT232_ALERT_2_G | Hirshfeld Test Diff (M-X)                        | Mol            | --C23       | .   |   | 7.2    | s.u.   |
| PLAT232_ALERT_2_G | Hirshfeld Test Diff (M-X)                        | Mol            | --C24       | .   |   | 7.0    | s.u.   |
| PLAT301_ALERT_3_G | Main Residue Disorder                            | .....(Resd 1 ) |             |     |   | 1%     | Note   |
| PLAT302_ALERT_4_G | Anion/Solvent/Minor-Residue Disorder (Resd 2 )   |                |             |     |   | 100%   | Note   |
| PLAT302_ALERT_4_G | Anion/Solvent/Minor-Residue Disorder (Resd 3 )   |                |             |     |   | 100%   | Note   |
| PLAT367_ALERT_2_G | Long? C(sp?)-C(sp?) Bond                         | C14            | -           | C19 | . | 1.50   | Ang.   |
| PLAT432_ALERT_2_G | Short Inter X...Y Contact                        | O4             | ..C27C      |     |   | 2.15   | Ang.   |
|                   |                                                  |                | -x,1-y,-z = |     |   | 5_565  | Check  |
| PLAT432_ALERT_2_G | Short Inter X...Y Contact                        | C25            | ..C27C      |     |   | 2.40   | Ang.   |
|                   |                                                  |                | -x,1-y,-z = |     |   | 5_565  | Check  |
| PLAT780_ALERT_1_G | Coordinates do not Form a Properly Connected Set |                |             |     |   | Please | Do !   |
| PLAT789_ALERT_4_G | Atoms with Negative _atom_site_disorder_group #  |                |             |     |   | 15     | Check  |
| PLAT860_ALERT_3_G | Number of Least-Squares Restraints               | .....          |             |     |   | 64     | Note   |
| PLAT883_ALERT_1_G | No Info/Value for _atom_sites_solution_primary . |                |             |     |   | Please | Do !   |
| PLAT910_ALERT_3_G | Missing # of FCF Reflection(s) Below Theta(Min). |                |             |     |   | 4      | Note   |

|                                                                    |       |     |      |
|--------------------------------------------------------------------|-------|-----|------|
| PLAT912_ALERT_4_G Missing # of FCF Reflections Above STh/L=        | 0.600 | 63  | Note |
| PLAT933_ALERT_2_G Number of OMIT Records in Embedded .res File ... |       | 6   | Note |
| PLAT941_ALERT_3_G Average HKL Measurement Multiplicity .....       |       | 4.9 | Low  |
| PLAT978_ALERT_2_G Number C-C Bonds with Positive Residual Density. |       | 1   | Info |

---

0 **ALERT level A** = Most likely a serious problem - resolve or explain  
 1 **ALERT level B** = A potentially serious problem, consider carefully  
 16 **ALERT level C** = Check. Ensure it is not caused by an omission or oversight  
 28 **ALERT level G** = General information/check it is not something unexpected

3 ALERT type 1 CIF construction/syntax error, inconsistent or missing data  
 26 ALERT type 2 Indicator that the structure model may be wrong or deficient  
 8 ALERT type 3 Indicator that the structure quality may be low  
 7 ALERT type 4 Improvement, methodology, query or suggestion  
 1 ALERT type 5 Informative message, check

---

It is advisable to attempt to resolve as many as possible of the alerts in all categories. Often the minor alerts point to easily fixed oversights, errors and omissions in your CIF or refinement strategy, so attention to these fine details can be worthwhile. In order to resolve some of the more serious problems it may be necessary to carry out additional measurements or structure refinements. However, the purpose of your study may justify the reported deviations and the more serious of these should normally be commented upon in the discussion or experimental section of a paper or in the "special\_details" fields of the CIF. checkCIF was carefully designed to identify outliers and unusual parameters, but every test has its limitations and alerts that are not important in a particular case may appear. Conversely, the absence of alerts does not guarantee there are no aspects of the results needing attention. It is up to the individual to critically assess their own results and, if necessary, seek expert advice.

### Publication of your CIF in IUCr journals

A basic structural check has been run on your CIF. These basic checks will be run on all CIFs submitted for publication in IUCr journals (*Acta Crystallographica*, *Journal of Applied Crystallography*, *Journal of Synchrotron Radiation*); however, if you intend to submit to *Acta Crystallographica Section C* or *E* or *IUCrData*, you should make sure that full publication checks are run on the final version of your CIF prior to submission.

### Publication of your CIF in other journals

Please refer to the *Notes for Authors* of the relevant journal for any special instructions relating to CIF submission.

---

**PLATON version of 13/07/2021; check.def file version of 13/07/2021**
