# Supplementary material for: Chemistry of CS2 and CS3 Bridged Decaborane Analogues: Regular Coordination Versus Cluster Expansion
Source: MDPI journal article supplement (doi:10.3390/molecules28030998), 2023-01-19
Supplement: s1 [file s1]

*Article*

# Chemistry of CS<sub>2</sub> and CS<sub>3</sub> Bridged Decaborane Analogues: Regular Coordination Versus Cluster Expansion

Ketaki Kar <sup>1</sup>, Suvam Saha <sup>1</sup>, Rahul Maganbhai Parmar <sup>1</sup>, Arindam Roy <sup>1</sup>, Marie Cordier <sup>2</sup>, Thierry Roisnel <sup>2</sup> and Sundargopal Ghosh <sup>1,\*</sup>

<sup>1</sup> Department of Chemistry, Indian Institute of Technology Madras, Chennai 600036, India

<sup>2</sup> Univ Rennes, CNRS, Institut des Sciences Chimiques de Rennes, UMR 6226, F-35000 Rennes, France

\* Correspondence: sghosh@iitm.ac.in

## Table of Contents

### I. Supplementary Data

|           |                                                       |
|-----------|-------------------------------------------------------|
| Figure S1 | Molecular structure and labelling diagram of <b>4</b> |
| Figure S2 | Molecular structure and labelling diagram of <b>5</b> |
| Figure S3 | Molecular structure and labelling diagram of <b>6</b> |
| Figure S4 | Molecular structure and labelling diagram of <b>7</b> |

### II. Spectroscopic Details

|            |                                                                 |
|------------|-----------------------------------------------------------------|
| Figure S5  | $^1\text{H}$ NMR spectrum of compound <b>3</b>                  |
| Figure S6  | $^{11}\text{B}\{^1\text{H}\}$ NMR spectrum of compound <b>3</b> |
| Figure S7  | IR spectrum of <b>3</b>                                         |
| Figure S8  | ESI-MS of compound <b>4</b>                                     |
| Figure S9  | $^1\text{H}$ NMR spectrum of compound <b>4</b>                  |
| Figure S10 | $^{11}\text{B}\{^1\text{H}\}$ NMR spectrum of compound <b>4</b> |
| Figure S11 | IR spectrum of <b>4</b>                                         |
| Figure S12 | ESI-MS of compound <b>5</b>                                     |
| Figure S13 | $^1\text{H}$ NMR spectrum of compound <b>5</b>                  |
| Figure S14 | $^{11}\text{B}\{^1\text{H}\}$ NMR spectrum of compound <b>5</b> |
| Figure S15 | IR spectrum of <b>5</b>                                         |
| Figure S16 | ESI-MS of compound <b>6</b>                                     |
| Figure S17 | $^1\text{H}$ NMR spectrum of compound <b>6</b>                  |
| Figure S18 | $^{11}\text{B}\{^1\text{H}\}$ NMR spectrum of compound <b>6</b> |
| Figure S19 | IR spectrum of <b>6</b>                                         |

### III. Electronic Structure Analysis

|            |                                                                                                |
|------------|------------------------------------------------------------------------------------------------|
| Figure S20 | HOMO-36 of <b>7</b>                                                                            |
| Figure S21 | HOMO-35 of <b>8</b>                                                                            |
| Figure S22 | Laplacian of the electron density map in the S3-S4-Co1 plane and Co1-Co2-Co3 plane of <b>8</b> |
| Figure S23 | Optimized geometry of <b>4</b>                                                                 |
| Figure S24 | Optimized geometry of <b>5</b>                                                                 |
| Figure S25 | Optimized geometry of <b>6</b>                                                                 |
| Figure S26 | Optimized geometry of <b>7</b>                                                                 |
| Figure S27 | Optimized geometry of <b>8</b>                                                                 |

## I. Supplementary Data

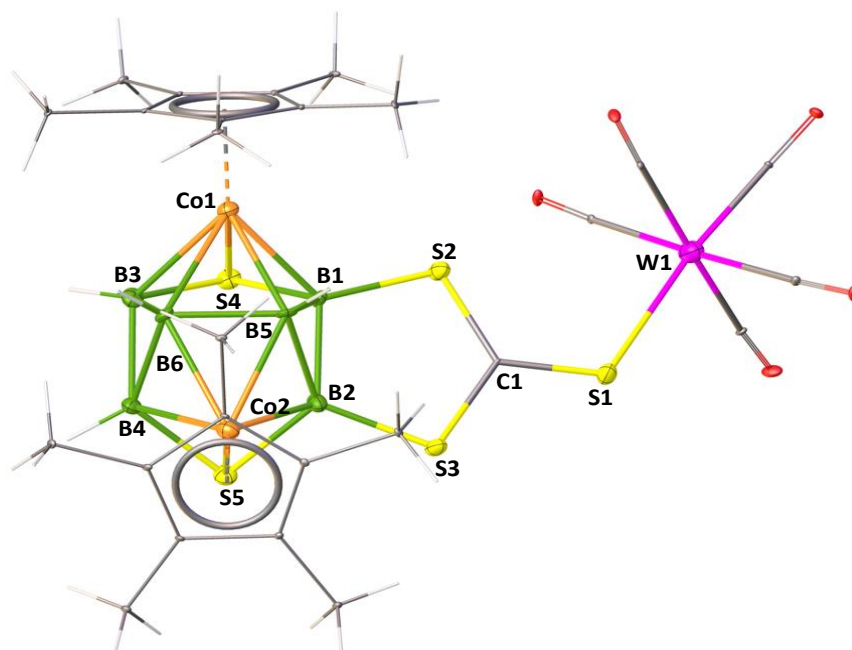

**Figure S1.** Molecular structures and labelling diagrams of **4**. Selected bond lengths (Å) and angles (°): **4**: B1–B2 1.790(19), W1–S1 2.529(3), S1–C1 1.648(12), S2–B1 1.886(12); C1–S1–W1 116.3(4), C1–S2–B1 102.0(6).

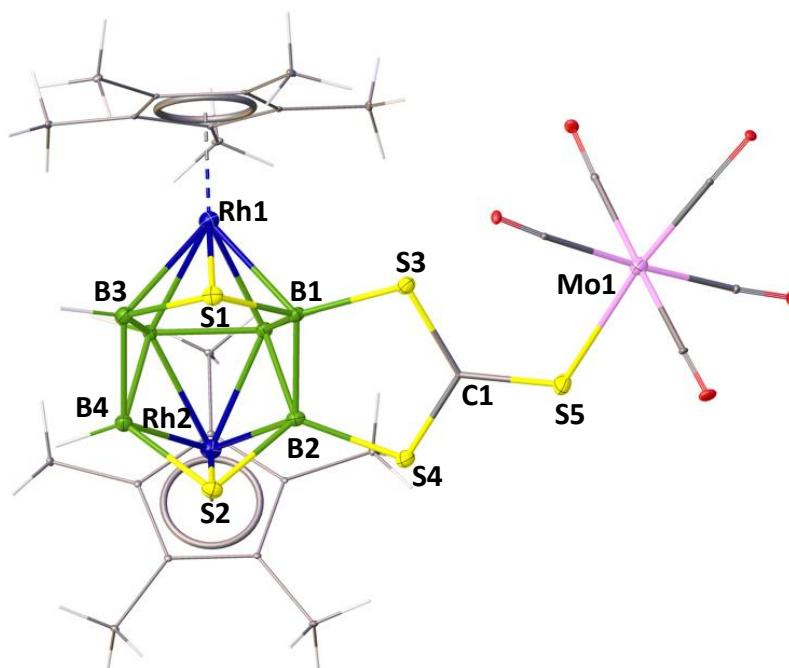

**Figure S2.** Molecular structures and labelling diagrams of **5**. Selected bond lengths (Å) and angles (°): **5**: B1–B2 1.808(8), Mo1–S5 2.5388(15), S5–C1 1.668(6), S3–B1 1.869(6); C1–S5–Mo1 117.1(2), C1–S3–B1 101.1(3).

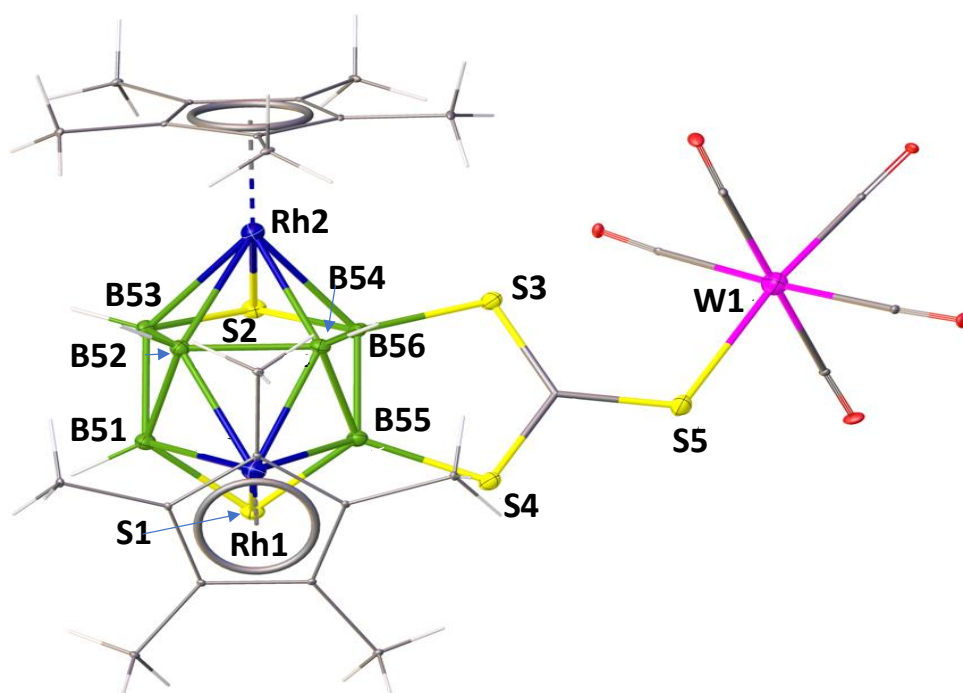

**Figure S3.** Molecular structures and labelling diagrams of **6**. Selected bond lengths (Å) and angles (°): **6**: B5–B6 1.809(4), W1–S5 2.5293(7), S5–C1 1.672(3), S3–B6 1.873(3); C1–S5–W1 116.73(9), C1–S3–B6 101.03(12).

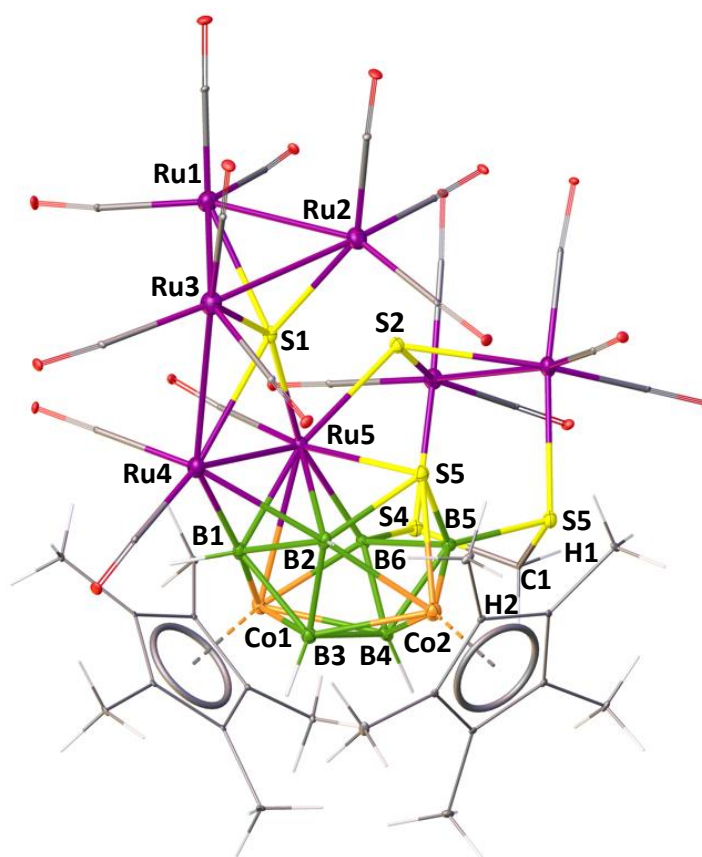

**Figure S4.** Molecular structure and labelling diagram of **7**. Selected bond lengths (Å) and angles (deg) in **7**: Ru1–S1 2.3488(18), Ru3–S1 2.4798(18), Ru4–S1 2.5153(18), Ru3–Ru4 3.0572(8), Ru5–S2 2.4311(17), S5–C7 1.821(7); Ru5–S1–Ru3 145.51(8), Ru4–S1–Ru3 75.47(5).

## II. Spectroscopic details

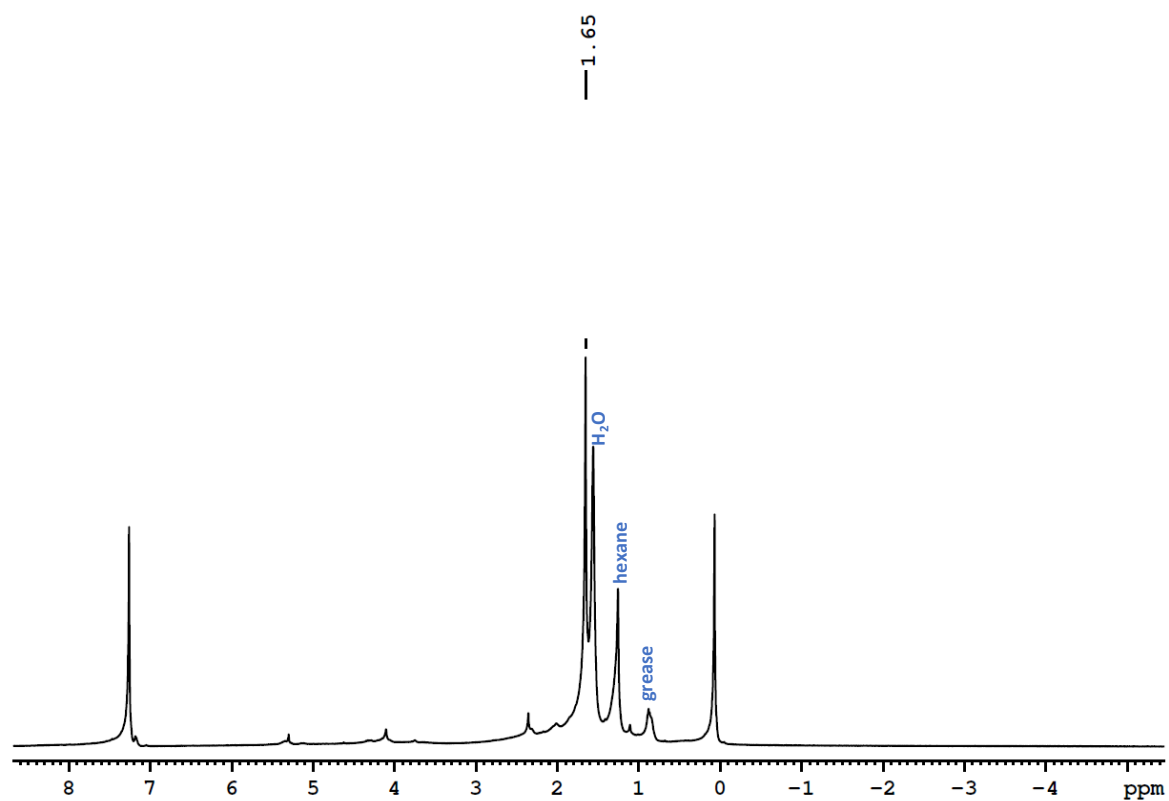

Figure S5.  $^1\text{H}$  NMR spectrum of compound 3 in  $\text{CDCl}_3$ .

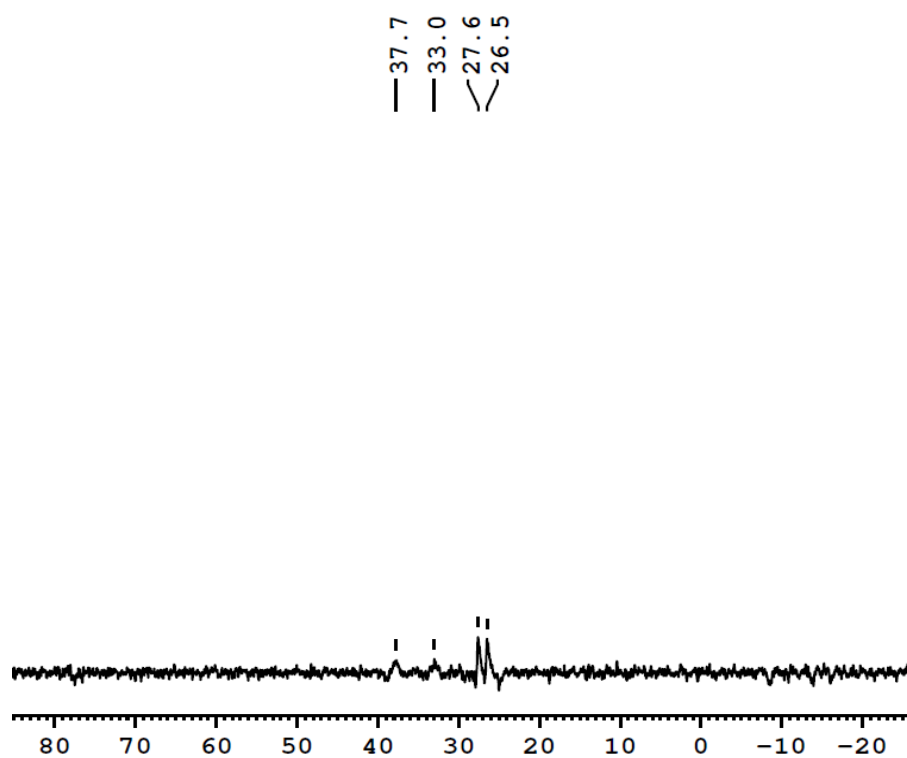

Figure S6.  $^{11}\text{B}\{^1\text{H}\}$  NMR spectrum of compound 3 in  $\text{C}_6\text{D}_6$ . [1-3]

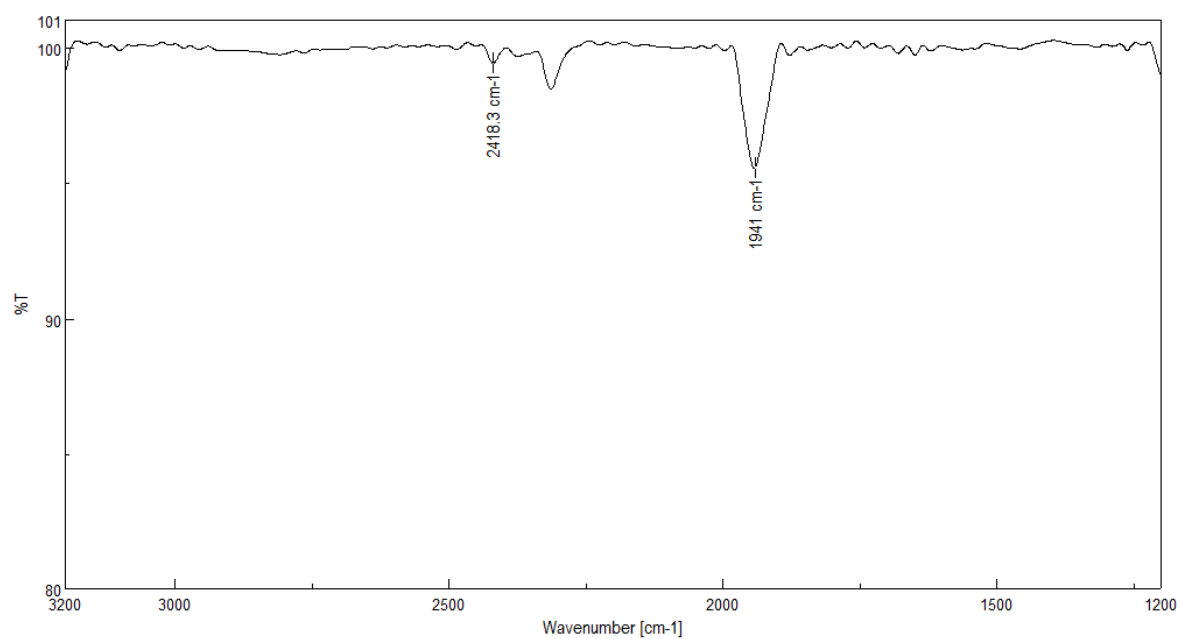

Figure S7. IR spectrum of 3 in  $\text{CH}_2\text{Cl}_2$ .

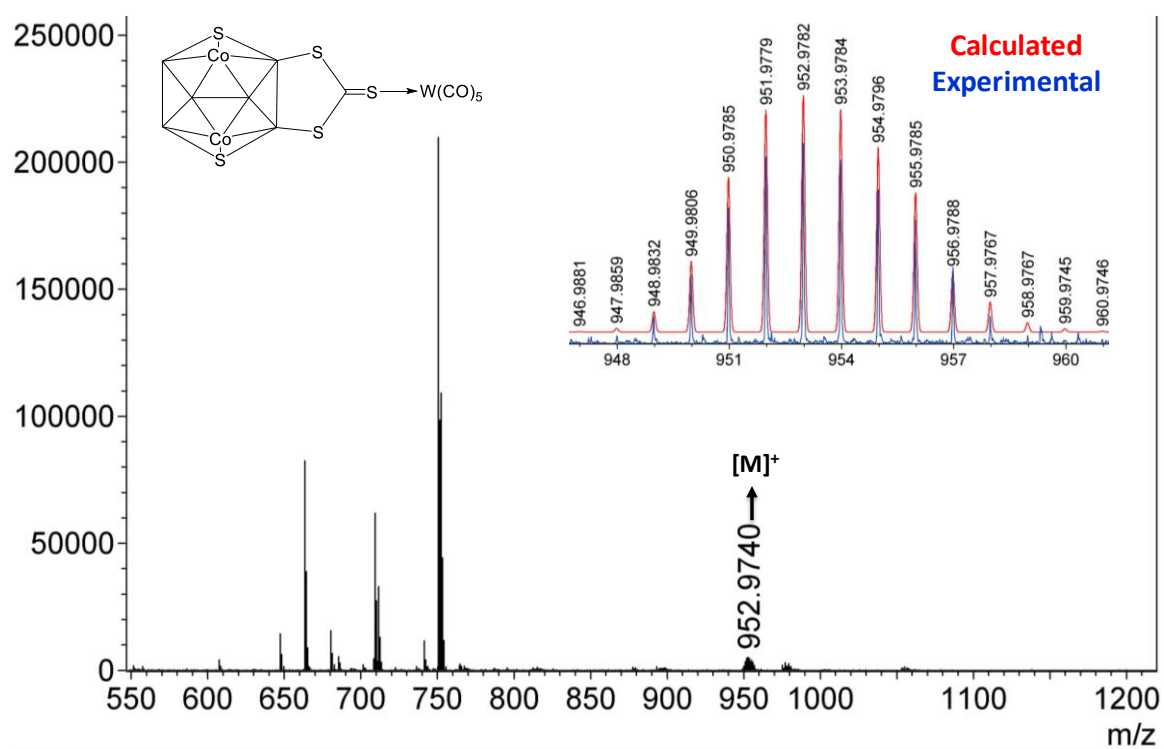

Figure S8. ESI-MS of compound 4.

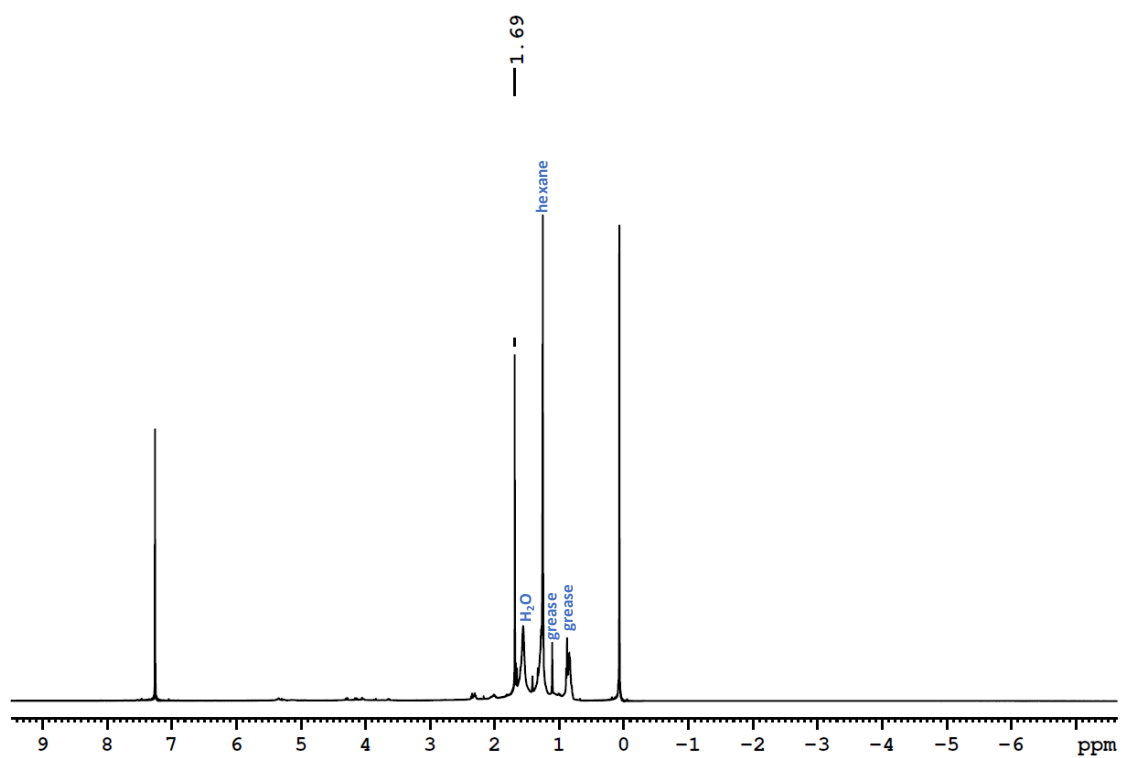

Figure S9.  $^1\text{H}$  NMR spectrum of compound **4** in  $\text{CDCl}_3$ .

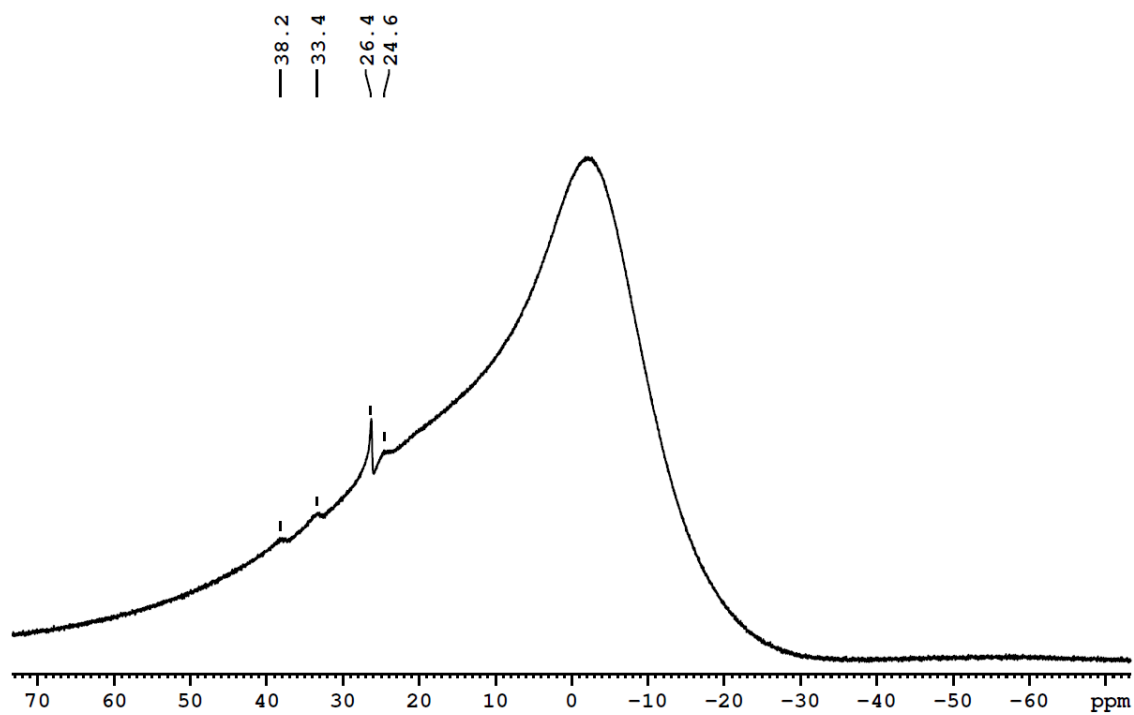

Figure S10.  $^{11}\text{B}\{^1\text{H}\}$  NMR spectrum of compound **4** in  $\text{CDCl}_3$ .

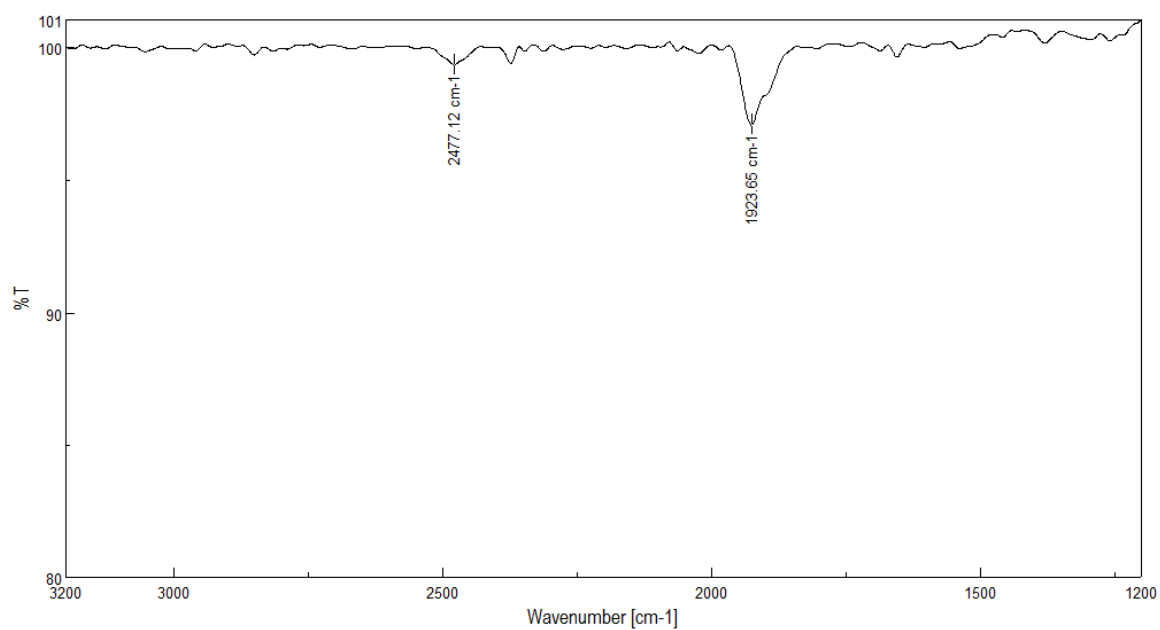

Figure S11. IR spectrum of 4 in  $\text{CH}_2\text{Cl}_2$ .

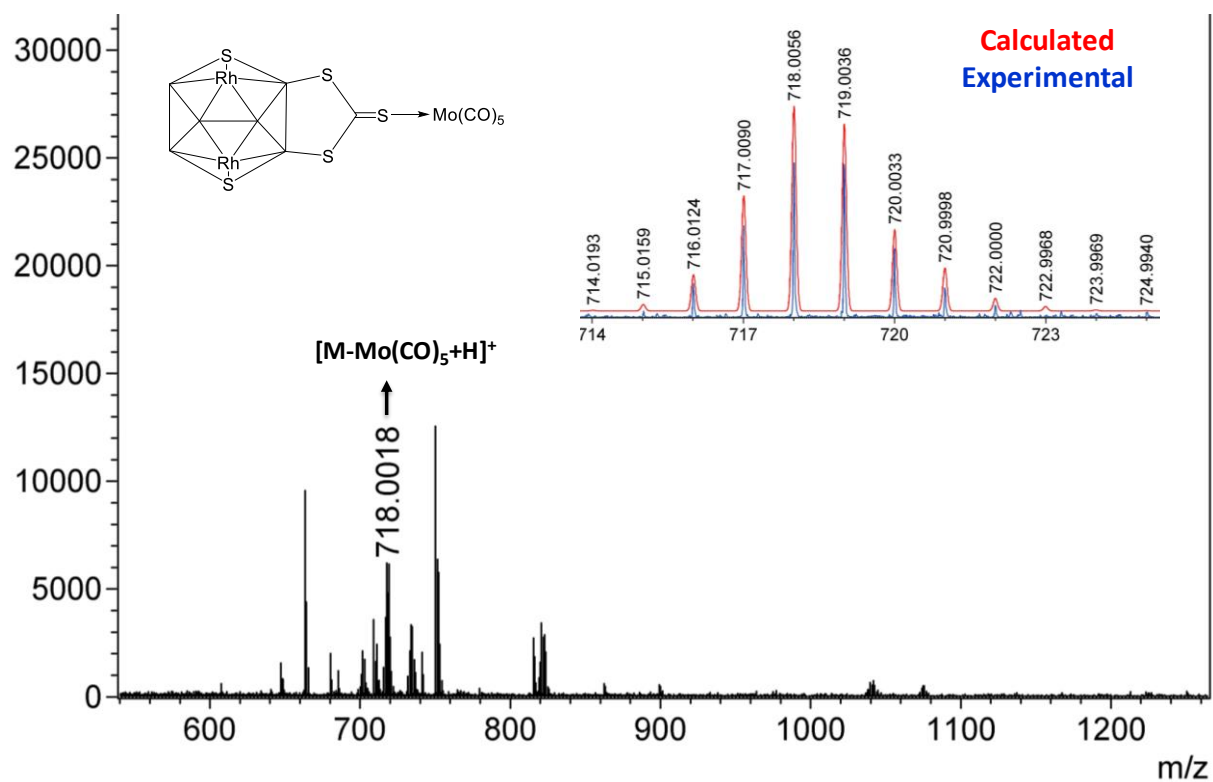

Figure S12. ESI-MS of compound 5.



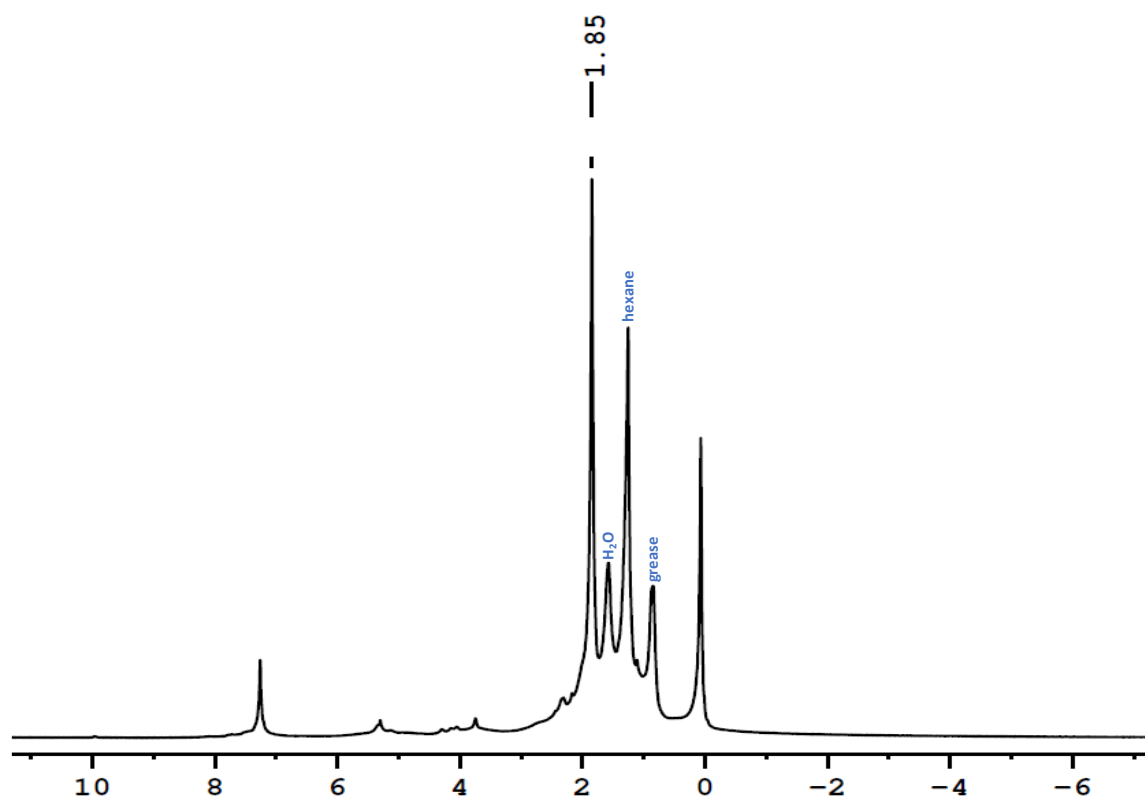

Figure S13. <sup>1</sup>H NMR spectrum of compound 5 in CDCl<sub>3</sub>.

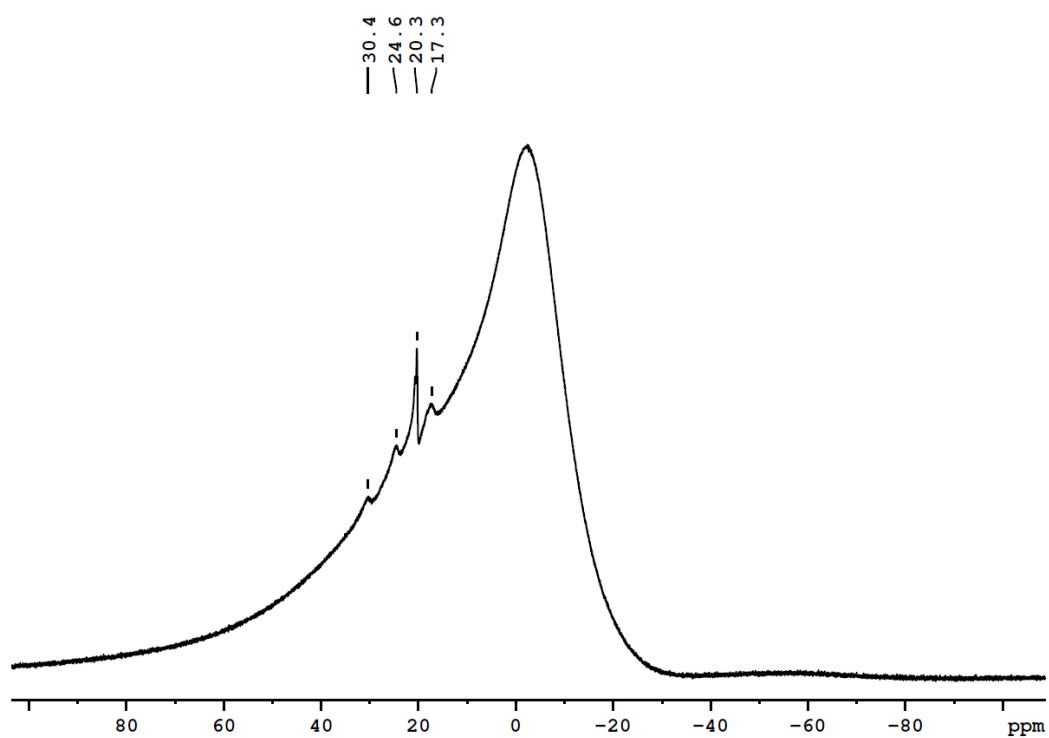

Figure S14. <sup>11</sup>B{<sup>1</sup>H} NMR spectrum of compound 5 in CDCl<sub>3</sub>.

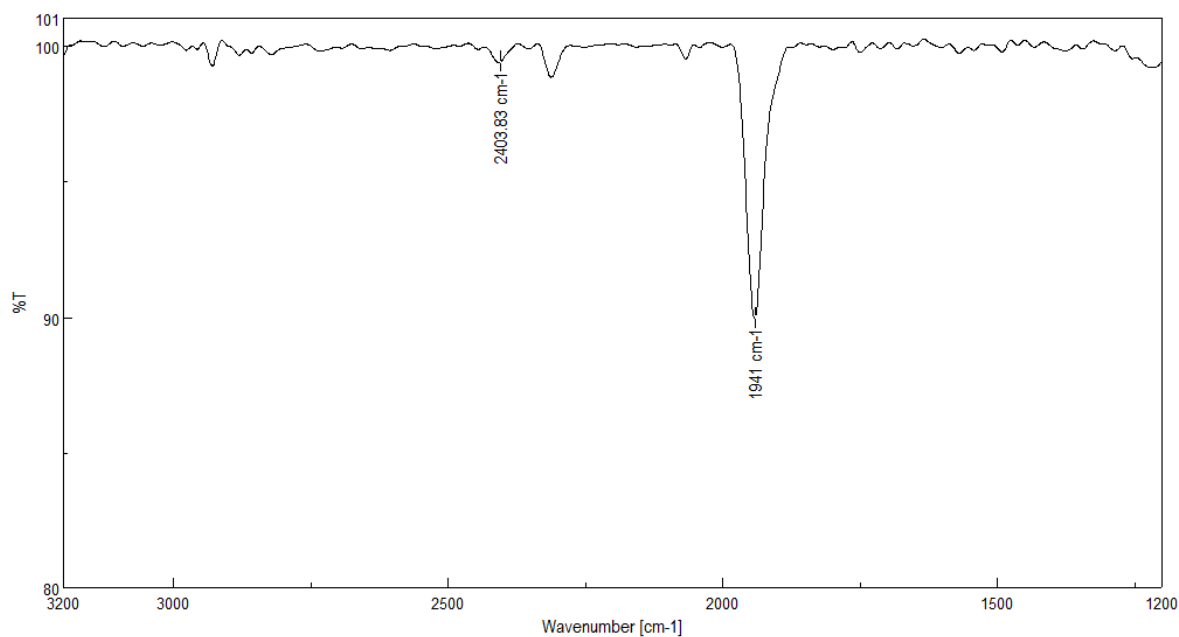

Figure S15. IR spectrum of 5 in  $\text{CH}_2\text{Cl}_2$ .

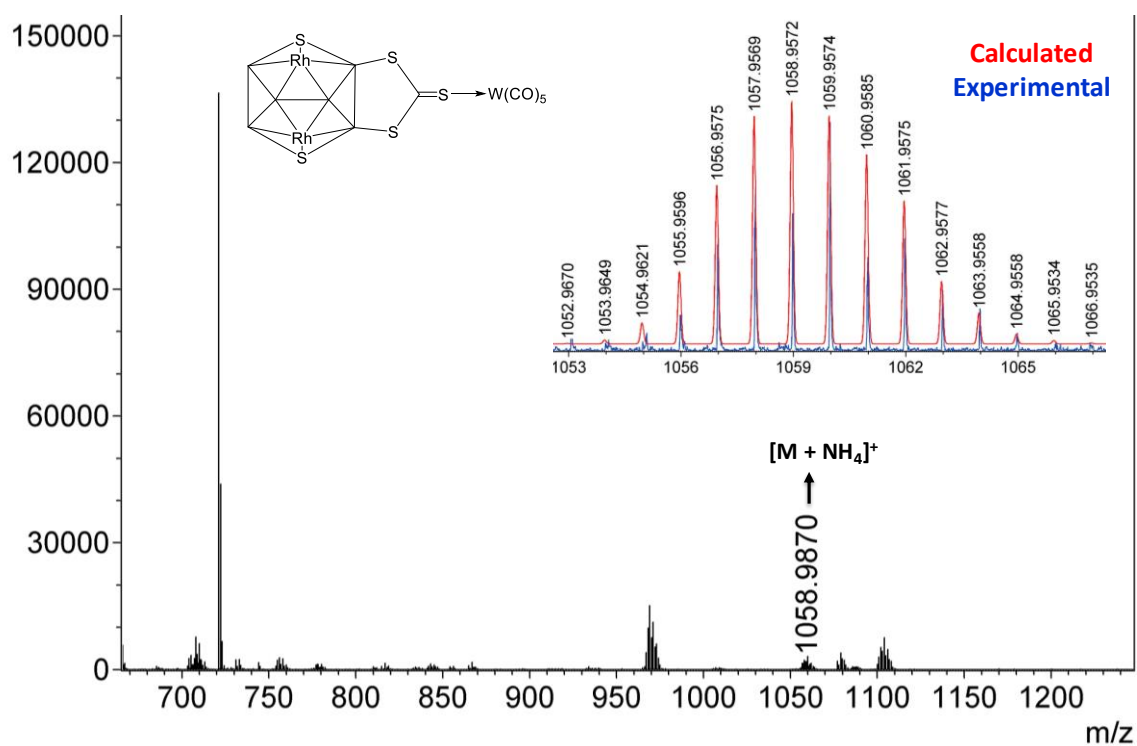

Figure S16. ESI-MS of compound 6.

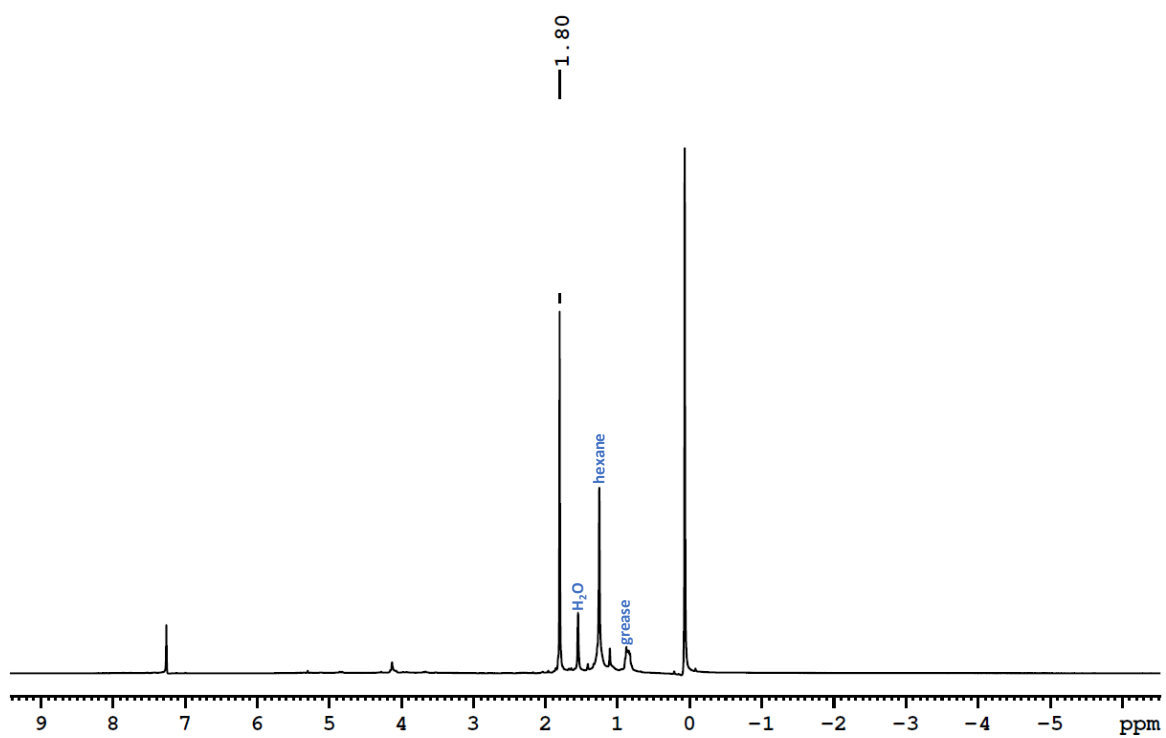

Figure S17. <sup>1</sup>H NMR spectrum of compound **6** in CDCl<sub>3</sub>.

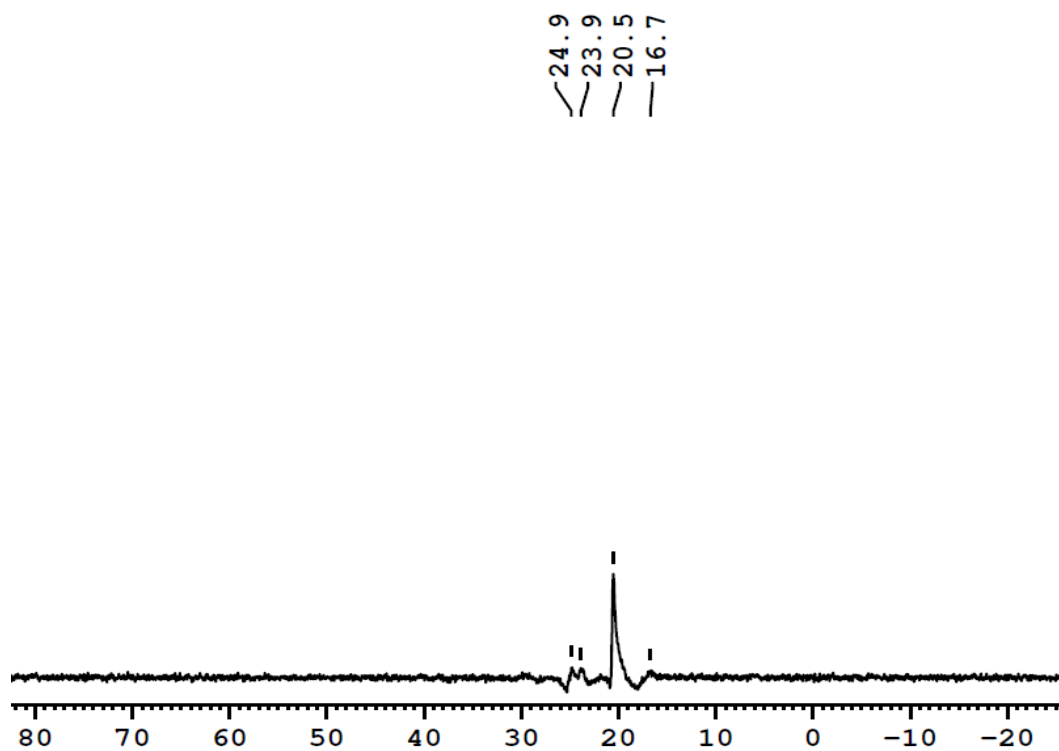

Figure S18. <sup>11</sup>B{<sup>1</sup>H} NMR spectrum of compound **6** in C<sub>6</sub>D<sub>6</sub>. [1-3]

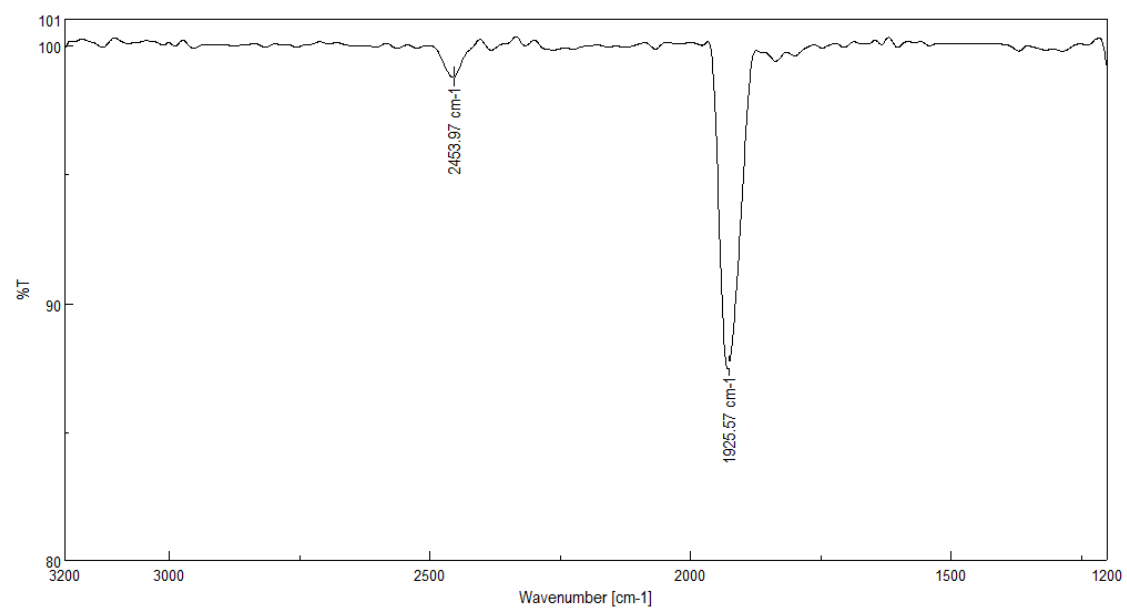

**Figure S19.** IR spectrum of **6** in CH<sub>2</sub>Cl<sub>2</sub>.

### III. Electronic Structure Analysis

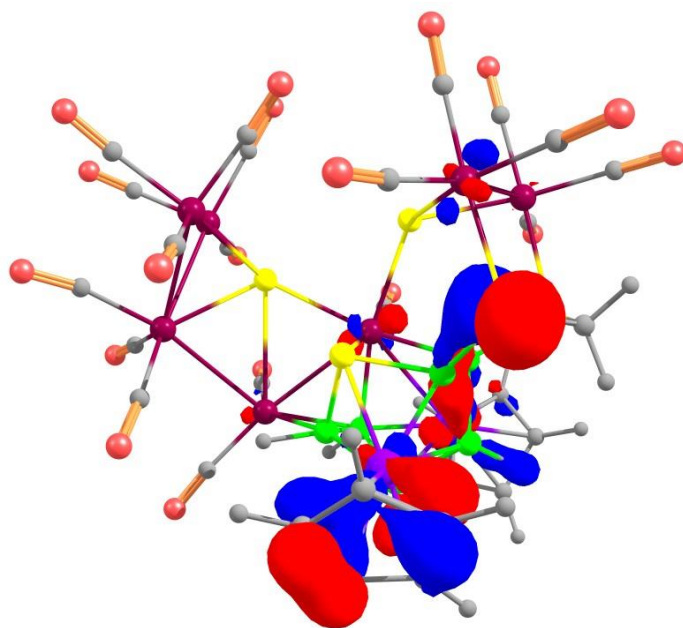

**Figure S20.** HOMO-36 of 7. (contour values for isosurface =  $\pm 0.04$  [e/bohr<sup>3</sup>]<sup>1/2</sup>).

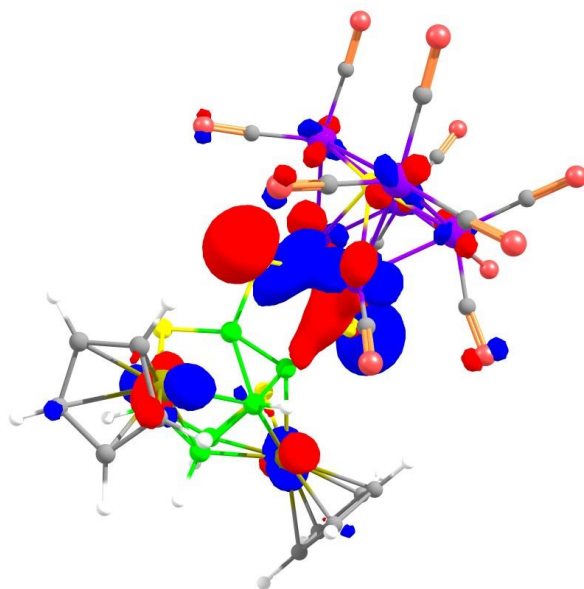

**Figure S21.** HOMO-35 of 8. (contour values for isosurface =  $\pm 0.04$  [e/bohr<sup>3</sup>]<sup>1/2</sup>).

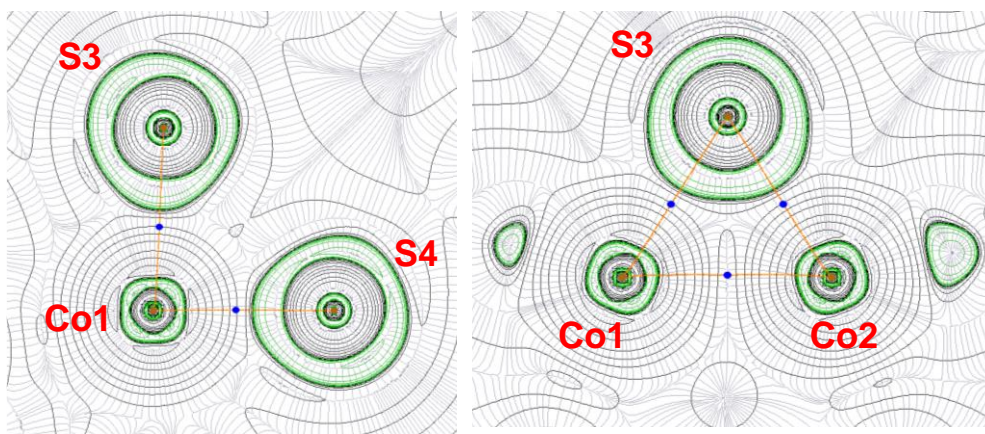

**Figure S22.** Contour-line map of the Laplacian of the electron density in the S3-S4-Co1 plane (left) and Co1-Co2-S3 plane (right) of **8**. The solid orange lines are bond paths, whereas the blue spheres indicate the ring-critical points. Areas of charge concentration [ $\rho(r) < 0$ ] are meant for green lines and areas of charge depletion [ $\rho(r) > 0$ ] are shown by black lines.

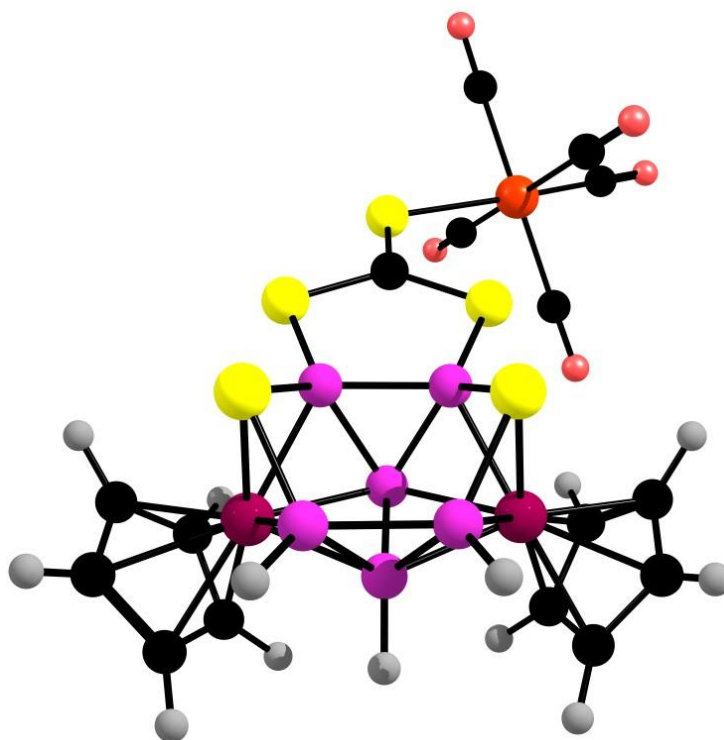

**Figure S23.** Optimized geometry of **4**

Total energy = -5966.4520685 a.u.

Cartesian coordinates for the calculated structure **4** (in Å)

|    |              |              |              |   |              |              |              |
|----|--------------|--------------|--------------|---|--------------|--------------|--------------|
| W  | 4.003176000  | -0.155524000 | 0.099499000  | C | -5.449328000 | -2.946985000 | 0.500574000  |
| Co | -2.661326000 | 2.088568000  | 0.076945000  | C | -5.739149000 | -1.859718000 | 1.376434000  |
| Co | -4.030690000 | -1.401477000 | 0.245654000  | C | -4.582576000 | -1.655086000 | 2.214373000  |
| S  | 2.098042000  | -1.873149000 | -0.272324000 | C | 0.574402000  | -1.215772000 | -0.567452000 |
| S  | 0.315349000  | 0.504447000  | -0.788481000 | B | -1.552132000 | 0.568625000  | -0.850411000 |
| S  | -0.790140000 | -2.332125000 | -0.677990000 | B | -2.213210000 | -1.125839000 | -0.773676000 |
| S  | -2.376220000 | 1.709757000  | -2.103450000 | B | -4.107806000 | 1.580841000  | -1.372640000 |
| S  | -3.639000000 | -1.500162000 | -1.949879000 | H | -4.896215000 | 2.397466000  | -1.800047000 |
| O  | 4.846123000  | -1.892150000 | 2.695291000  | B | -4.796683000 | -0.170071000 | -1.286836000 |
| O  | 5.894091000  | -2.047203000 | -1.724961000 | H | -5.944580000 | -0.267073000 | -1.666542000 |
| O  | 3.402784000  | 1.680593000  | -2.499696000 | B | -2.569070000 | 0.055772000  | 0.539461000  |
| O  | 2.219602000  | 1.755568000  | 2.002397000  | H | -1.948254000 | -0.137743000 | 1.566467000  |
| O  | 6.507868000  | 1.717585000  | 0.681035000  | B | -4.228160000 | 0.690248000  | 0.162957000  |
| C  | 4.523403000  | -1.281338000 | 1.759987000  | H | -5.136312000 | 1.077179000  | 0.877373000  |
| C  | 5.200462000  | -1.377044000 | -1.076622000 | H | -2.595785000 | -2.745053000 | 2.316178000  |
| C  | 3.574878000  | 1.005255000  | -1.568908000 | H | -3.602416000 | -4.247908000 | 0.286493000  |
| C  | 2.837491000  | 1.059577000  | 1.299266000  | H | -4.476075000 | -0.880220000 | 2.983492000  |
| C  | 5.588303000  | 1.029435000  | 0.465731000  | H | -6.653158000 | -1.253591000 | 1.378320000  |
| C  | -1.349263000 | 2.899259000  | 1.514184000  | H | -6.100349000 | -3.319938000 | -0.300558000 |
| C  | -2.690786000 | 2.774015000  | 2.021285000  | H | -4.646609000 | 3.700368000  | 1.335476000  |
| C  | -3.561741000 | 3.595782000  | 1.213460000  | H | -2.997690000 | 2.166305000  | 2.881410000  |
| C  | -2.766750000 | 4.192834000  | 0.191385000  | H | -0.454691000 | 2.390087000  | 1.895500000  |
| C  | -1.400902000 | 3.758627000  | 0.375391000  | H | -0.552628000 | 4.019658000  | -0.270813000 |
| C  | -3.595674000 | -2.648813000 | 1.875180000  | H | -3.134225000 | 4.833214000  | -0.620624000 |
| C  | -4.124194000 | -3.434829000 | 0.807727000  |   |              |              |              |

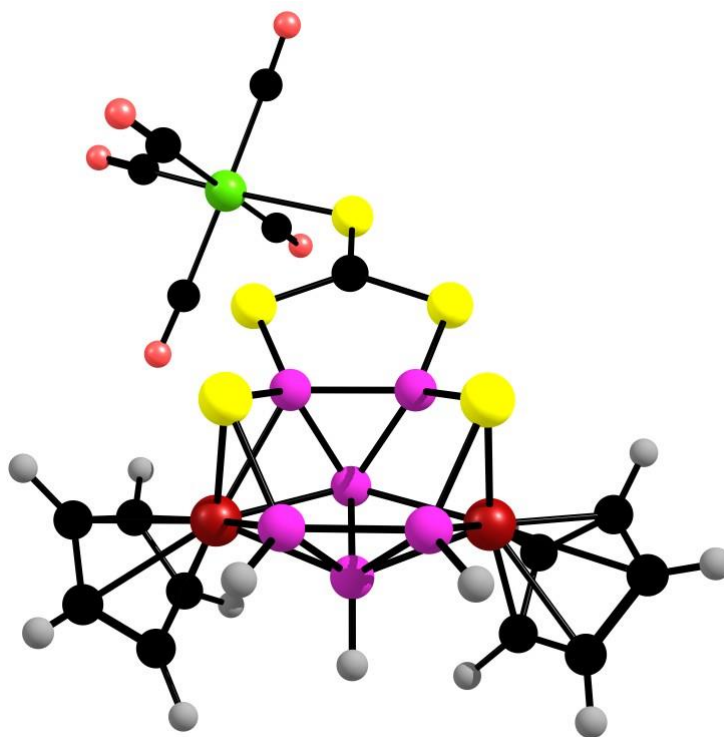

**Figure S24.** Optimized geometry of **5**

Total energy = -3423.2055592 a.u.

Cartesian coordinates for the calculated structure **2** (in Å)

|    |              |              |              |   |              |              |              |
|----|--------------|--------------|--------------|---|--------------|--------------|--------------|
| Rh | -1.956446000 | 2.184854000  | -0.017153000 | C | 3.518207000  | 1.038762000  | -1.207034000 |
| Rh | -3.489231000 | -1.463074000 | -0.181942000 | C | 6.247220000  | 0.841130000  | -0.476762000 |
| Mo | 4.648038000  | -0.304116000 | -0.147689000 | C | 5.054370000  | -1.317460000 | -1.888534000 |
| S  | -1.611289000 | 1.654243000  | 2.253258000  | C | 5.838020000  | -1.626772000 | 0.887678000  |
| S  | -2.940696000 | -1.516594000 | 2.110771000  | B | -0.860770000 | 0.518866000  | 0.933029000  |
| S  | 1.002607000  | 0.414453000  | 0.812777000  | B | -1.560681000 | -1.164518000 | 0.856575000  |
| S  | -0.164707000 | -2.396579000 | 0.686005000  | B | -3.378855000 | 1.583654000  | 1.586022000  |
| S  | 2.720480000  | -1.983037000 | 0.199949000  | H | -4.134891000 | 2.396639000  | 2.072482000  |
| O  | 4.183275000  | 1.341259000  | 2.581516000  | B | -4.105032000 | -0.152145000 | 1.508214000  |
| O  | 2.933701000  | 1.827528000  | -1.836042000 | H | -5.231280000 | -0.219927000 | 1.951469000  |
| O  | 7.183402000  | 1.511660000  | -0.670278000 | B | -1.936896000 | 0.045382000  | -0.452479000 |
| O  | 5.312637000  | -1.869692000 | -2.877807000 | H | -1.333501000 | -0.160228000 | -1.487169000 |
| O  | 6.539988000  | -2.352624000 | 1.461381000  | B | -3.608833000 | 0.728075000  | 0.023426000  |
| C  | -0.505128000 | 3.259972000  | -1.437692000 | H | -4.565279000 | 1.148110000  | -0.603415000 |
| C  | -0.851606000 | 4.165596000  | -0.384054000 | H | -2.360877000 | -2.543055000 | -2.723764000 |
| C  | -2.274130000 | 4.414436000  | -0.431403000 | H | -2.949964000 | -4.387246000 | -0.809940000 |
| C  | -2.816051000 | 3.631660000  | -1.496585000 | H | -5.409543000 | -3.784183000 | 0.214688000  |
| C  | -1.723843000 | 2.897120000  | -2.108183000 | H | -6.366415000 | -1.596904000 | -1.090903000 |
| C  | -3.281794000 | -2.588397000 | -2.129051000 | H | -4.465029000 | -0.803391000 | -2.885597000 |
| C  | -4.387353000 | -1.656576000 | -2.199801000 | H | 0.499848000  | 2.880258000  | -1.665086000 |
| C  | -5.401603000 | -2.087678000 | -1.269020000 | H | -0.150459000 | 4.602340000  | 0.339537000  |
| C  | -4.896862000 | -3.236137000 | -0.586707000 | H | -2.838034000 | 5.072751000  | 0.241274000  |
| C  | -3.590782000 | -3.553204000 | -1.123282000 | H | -3.869798000 | 3.588193000  | -1.798959000 |
| C  | 1.220959000  | -1.306557000 | 0.555686000  | H | -1.807273000 | 2.219716000  | -2.967304000 |
| C  | 4.308604000  | 0.733820000  | 1.599188000  |   |              |              |              |



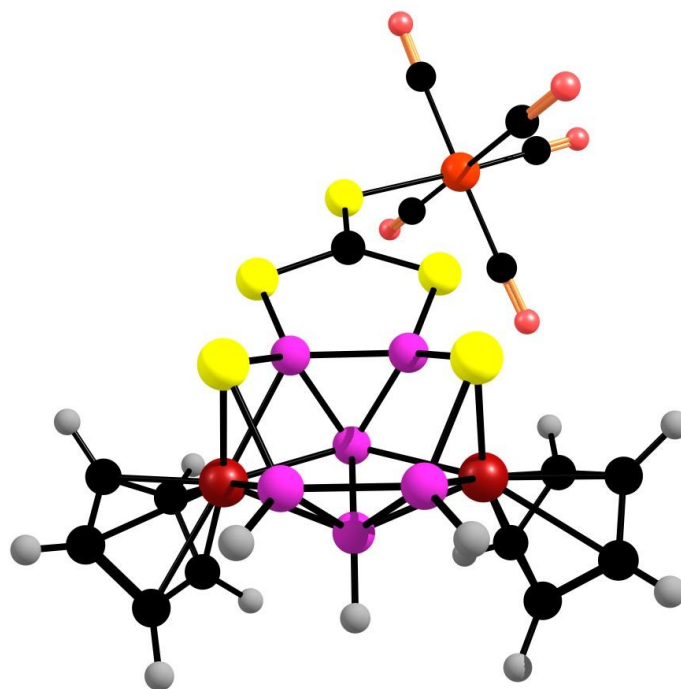

**Figure S25.** Optimized geometry of **6**.

Total energy = -3422.1091383 a.u.

Cartesian coordinates for the calculated structure **2** (in Å)

|    |              |              |              |   |              |              |              |
|----|--------------|--------------|--------------|---|--------------|--------------|--------------|
| Rh | 3.832938000  | -1.472365000 | -0.184286000 | B | 3.964712000  | 0.718129000  | 0.018083000  |
| C  | 5.658437000  | -1.947748000 | -1.450432000 | H | 4.920117000  | 1.132688000  | -0.613859000 |
| C  | 4.493764000  | -1.744302000 | -2.283722000 | B | 3.746242000  | 1.576336000  | 1.580091000  |
| C  | 3.551112000  | -2.803302000 | -2.009824000 | H | 4.509347000  | 2.384756000  | 2.062908000  |
| C  | 4.101690000  | -3.612358000 | -0.970562000 | B | 2.287692000  | 0.044363000  | -0.451068000 |
| C  | 5.406344000  | -3.085009000 | -0.627285000 | H | 1.681617000  | -0.163023000 | -1.484007000 |
| Rh | 2.319608000  | 2.183961000  | -0.018052000 | B | 1.908323000  | -1.160827000 | 0.860833000  |
| C  | 2.658740000  | 4.408252000  | -0.441403000 | B | 1.219578000  | 0.525966000  | 0.938680000  |
| C  | 1.234213000  | 4.176940000  | -0.374516000 | C | -0.872642000 | -1.285840000 | 0.571289000  |
| C  | 0.862129000  | 3.273414000  | -1.421581000 | S | 3.289838000  | -1.521755000 | 2.110385000  |
| C  | 2.067043000  | 2.894417000  | -2.107594000 | S | 1.982048000  | 1.658381000  | 2.254552000  |
| C  | 3.176596000  | 3.616106000  | -1.511894000 | S | -0.645417000 | 0.432793000  | 0.828336000  |
| W  | -4.300134000 | -0.238970000 | -0.118699000 | S | 0.504373000  | -2.385584000 | 0.695554000  |
| C  | -3.146630000 | 1.104944000  | -1.184132000 | S | -2.379827000 | -1.952621000 | 0.218844000  |
| O  | -2.548337000 | 1.887755000  | -1.809739000 | H | 0.548268000  | 4.623510000  | 0.357641000  |
| C  | -4.731233000 | -1.249175000 | -1.875993000 | H | -0.150551000 | 2.906050000  | -1.635231000 |
| O  | -4.999809000 | -1.797330000 | -2.865747000 | H | 3.239795000  | 5.061035000  | 0.222017000  |
| C  | -5.901840000 | 0.934993000  | -0.441552000 | H | 4.225550000  | 3.559036000  | -1.828401000 |
| O  | -6.832617000 | 1.616176000  | -0.629931000 | H | 2.130397000  | 2.214236000  | -2.966228000 |
| C  | -5.513142000 | -1.564193000 | 0.921622000  | H | 6.556758000  | -1.318194000 | -1.432704000 |
| O  | -6.220597000 | -2.287520000 | 1.493401000  | H | 4.373841000  | -0.956438000 | -3.038225000 |
| C  | -3.936007000 | 0.794507000  | 1.646211000  | H | 2.570854000  | -2.934539000 | -2.485073000 |
| O  | -3.792512000 | 1.393776000  | 2.632088000  | H | 3.621045000  | -4.485866000 | -0.511179000 |
| B  | 4.460288000  | -0.165330000 | 1.502253000  | H | 6.079266000  | -3.486490000 | 0.141417000  |
| H  | 5.588115000  | -0.240150000 | 1.940364000  |   |              |              |              |

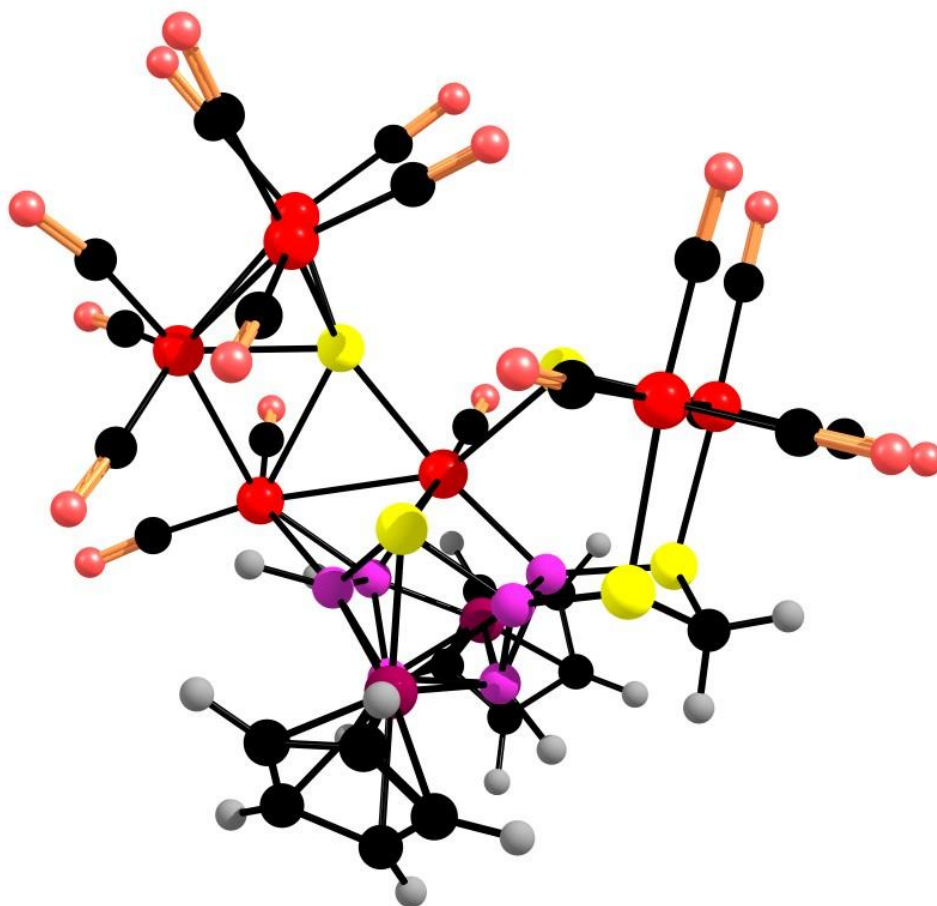

Figure S26. Optimized geometry of 7.

Total energy = -8038.5743591 a.u.

Cartesian coordinates for the calculated structure 7 (in Å)

|    |             |              |              |    |              |              |              |
|----|-------------|--------------|--------------|----|--------------|--------------|--------------|
| Ru | 3.310310000 | -1.814591000 | -1.361716000 | C  | 3.689091000  | 1.564832000  | 1.926289000  |
| C  | 3.660316000 | -1.179783000 | -3.131906000 | O  | 3.714900000  | 2.283023000  | 2.851092000  |
| O  | 3.883984000 | -0.930488000 | -4.245702000 | Ru | 2.103855000  | 2.460120000  | -0.640939000 |
| C  | 4.974558000 | -2.695846000 | -1.173584000 | C  | 3.489216000  | 3.662851000  | -0.311500000 |
| O  | 5.999877000 | -3.238413000 | -1.083484000 | O  | 4.286789000  | 4.488025000  | -0.118262000 |
| C  | 2.362070000 | -3.362342000 | -1.883058000 | C  | 2.791980000  | 2.114637000  | -2.326651000 |
| O  | 1.788762000 | -4.317688000 | -2.218478000 | O  | 3.180261000  | 1.961078000  | -3.411014000 |
| Ru | 2.443843000 | -2.023837000 | 1.301468000  | Ru | -0.433574000 | 0.824080000  | -0.776067000 |
| C  | 3.765134000 | -3.309904000 | 1.747058000  | C  | -0.331122000 | 0.499709000  | -2.595451000 |
| O  | 4.517816000 | -4.145138000 | 2.043027000  | O  | -0.247363000 | 0.265788000  | -3.734872000 |
| C  | 1.156670000 | -3.377646000 | 1.203042000  | Ru | -3.782441000 | -1.719845000 | -1.400373000 |
| O  | 0.381780000 | -4.247739000 | 1.198926000  | C  | -3.395200000 | -3.506292000 | -1.895011000 |
| C  | 2.007093000 | -1.395060000 | 3.058390000  | O  | -3.176897000 | -4.578051000 | -2.276232000 |
| O  | 1.807833000 | -1.047503000 | 4.151397000  | C  | -3.704642000 | -1.179553000 | -3.232434000 |
| Ru | 3.781739000 | 0.365005000  | 0.453114000  | O  | -3.707165000 | -0.866734000 | -4.351296000 |
| C  | 5.167701000 | 0.822016000  | -0.778229000 | C  | -5.650916000 | -2.085600000 | -1.223257000 |
| O  | 6.091424000 | 1.117494000  | -1.425718000 | O  | -6.788152000 | -2.303890000 | -1.120469000 |
| C  | 4.996418000 | -0.698368000 | 1.453952000  | Ru | -3.007203000 | -2.086635000 | 1.325267000  |
| O  | 5.878219000 | -1.143048000 | 2.075775000  | C  | -2.674025000 | -3.893420000 | 0.919226000  |

|    |              |              |              |   |              |             |              |
|----|--------------|--------------|--------------|---|--------------|-------------|--------------|
| O  | -2.520033000 | -5.028399000 | 0.748525000  | H | 0.970011000  | 3.605599000 | -1.415715000 |
| C  | -4.702499000 | -2.572124000 | 2.039059000  | B | 0.243462000  | 2.586681000 | 0.861586000  |
| O  | -5.735013000 | -2.867977000 | 2.484911000  | H | 1.469595000  | 2.671779000 | 1.192552000  |
| C  | -1.938947000 | -2.174905000 | 2.918994000  | B | -0.972634000 | 3.802370000 | 0.368186000  |
| O  | -1.362673000 | -2.322188000 | 3.915500000  | H | -0.766687000 | 5.002633000 | 0.403486000  |
| Co | -1.846506000 | 3.056408000  | -1.436771000 | B | -2.562426000 | 2.977788000 | 0.557386000  |
| C  | -1.524357000 | 4.694644000  | -2.742633000 | H | -3.650067000 | 3.503875000 | 0.734035000  |
| C  | -2.811553000 | 4.792444000  | -2.111500000 | B | -2.300332000 | 1.423667000 | 1.352664000  |
| C  | -3.584880000 | 3.644584000  | -2.494423000 | B | -2.510265000 | 1.489288000 | -0.458829000 |
| C  | -2.766244000 | 2.820612000  | -3.332570000 | C | -4.913248000 | 0.745723000 | 0.813299000  |
| C  | -1.491035000 | 3.470775000  | -3.486093000 | H | -5.770450000 | 0.052040000 | 0.892715000  |
| Co | -1.282522000 | 2.979778000  | 2.267712000  | H | -5.239658000 | 1.785414000 | 1.014976000  |
| C  | -0.234345000 | 3.459916000  | 4.035947000  | H | -4.608577000 | 3.418766000 | -2.172113000 |
| C  | -1.435196000 | 2.722492000  | 4.357921000  | H | -3.140894000 | 5.598940000 | -1.444401000 |
| C  | -2.558110000 | 3.455956000  | 3.867227000  | H | -0.704162000 | 5.416629000 | -2.645638000 |
| C  | -2.052997000 | 4.638964000  | 3.215248000  | H | -3.056277000 | 1.865808000 | -3.788312000 |
| C  | -0.616823000 | 4.652953000  | 3.351193000  | H | -0.642787000 | 3.091085000 | -4.068854000 |
| S  | 1.665499000  | -0.470665000 | -0.328406000 | H | 0.793796000  | 3.141298000 | 4.253702000  |
| S  | -1.531253000 | -1.461271000 | -0.545823000 | H | -1.469278000 | 1.750433000 | 4.867654000  |
| S  | -0.499562000 | 0.941442000  | 1.713737000  | H | -3.611206000 | 3.159090000 | 3.944681000  |
| S  | -4.203550000 | 0.666912000  | -0.879654000 | H | -2.657242000 | 5.403563000 | 2.711376000  |
| S  | -3.636571000 | 0.275755000  | 2.051180000  | H | 0.060649000  | 5.420023000 | 2.957017000  |
| B  | -0.004358000 | 2.938885000  | -0.817503000 |   |              |             |              |

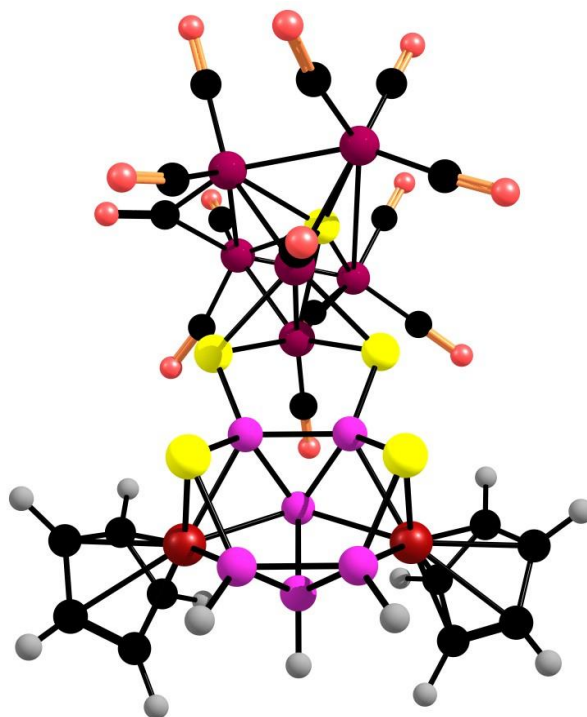

**Figure S27.** Optimized geometry of **8**.

Total energy = -12520.3674633 a.u.

Cartesian coordinates for the calculated structure **8** (in Å)

|    |              |              |              |   |              |              |              |
|----|--------------|--------------|--------------|---|--------------|--------------|--------------|
| Co | -0.585400000 | -0.030298000 | 1.088724000  | C | -4.764405000 | -1.919850000 | -1.617340000 |
| Co | -0.982975000 | 0.017556000  | -1.346070000 | C | -2.211392000 | 2.140293000  | -2.270165000 |
| Co | -3.152543000 | -1.212000000 | -1.898506000 | C | -3.425806000 | -0.337604000 | -3.430672000 |
| S  | -2.633061000 | -0.569064000 | 0.127072000  | C | -2.199595000 | -2.653192000 | -2.340454000 |
| Co | -2.506293000 | -1.324616000 | 2.176513000  | C | -0.395707000 | -0.000799000 | -2.990185000 |
| Co | -2.757001000 | 1.191469000  | 1.543507000  | C | -1.410239000 | -2.719807000 | 2.295835000  |
| Co | -3.170842000 | 1.254754000  | -1.084123000 | C | -4.101213000 | -2.108654000 | 2.314642000  |
| Rh | 3.824178000  | 2.031496000  | -0.049814000 | B | 4.592628000  | -0.858252000 | -1.919813000 |
| Rh | 3.890331000  | -1.945066000 | -0.106753000 | H | 5.490566000  | -1.309191000 | -2.597639000 |
| C  | 4.358260000  | 2.656924000  | 2.013881000  | B | 4.770179000  | 0.063721000  | -0.389916000 |
| C  | 5.457614000  | 3.015518000  | 1.138653000  | H | 5.920564000  | 0.078263000  | 0.009380000  |
| C  | 4.977339000  | 3.989736000  | 0.211398000  | B | 4.559030000  | 1.023891000  | -1.892670000 |
| C  | 3.585735000  | 4.240176000  | 0.515608000  | H | 5.441851000  | 1.525051000  | -2.554946000 |
| C  | 3.213518000  | 3.447928000  | 1.647491000  | B | 2.017414000  | 0.940247000  | -0.687283000 |
| C  | 4.223747000  | -2.688736000 | 1.964790000  | B | 3.103659000  | 0.023544000  | 0.425087000  |
| C  | 5.471829000  | -2.783097000 | 1.229657000  | H | 2.714146000  | 0.007999000  | 1.569163000  |
| C  | 5.292014000  | -3.732683000 | 0.174572000  | B | 2.045636000  | -0.897099000 | -0.714234000 |
| C  | 3.933820000  | -4.211554000 | 0.247501000  | O | -5.804185000 | -2.408816000 | -1.470627000 |
| C  | 3.284857000  | -3.596785000 | 1.369861000  | O | -5.929182000 | 1.925695000  | -1.809973000 |
| C  | 0.364173000  | -0.162550000 | 2.541163000  | O | -3.644833000 | 0.092191000  | -4.487062000 |
| C  | -1.438856000 | 2.013411000  | 2.374707000  | O | -1.753840000 | 2.874147000  | -3.050088000 |
| C  | -2.411427000 | -0.484721000 | 3.750815000  | O | -3.067562000 | 3.779094000  | 0.307057000  |
| C  | -3.010658000 | 2.599492000  | 0.262660000  | O | 0.060190000  | -0.054253000 | -4.057209000 |
| C  | -4.201413000 | 1.614377000  | 2.474275000  | O | -5.124400000 | 1.902170000  | 3.115417000  |
| C  | -4.845655000 | 1.653523000  | -1.497566000 | O | -5.118906000 | -2.648585000 | 2.434279000  |

|   |              |              |              |
|---|--------------|--------------|--------------|
| O | -0.724179000 | -3.643792000 | 2.452944000  |
| O | -2.362919000 | -0.102097000 | 4.846987000  |
| O | 1.001516000  | -0.288485000 | 3.506821000  |
| O | -0.748133000 | 2.732130000  | 2.982699000  |
| O | -1.640880000 | -3.605709000 | -2.693035000 |
| S | 2.845957000  | 1.776337000  | -2.173339000 |
| S | 2.906053000  | -1.660297000 | -2.222271000 |
| S | 0.283460000  | 1.548709000  | -0.265042000 |
| S | 0.323827000  | -1.562838000 | -0.332829000 |
| H | 6.472625000  | 2.601022000  | 1.177759000  |
| H | 4.406168000  | 1.943231000  | 2.846046000  |
| H | 2.224789000  | 3.417745000  | 2.122854000  |
| H | 2.924738000  | 4.926197000  | -0.030451000 |
| H | 5.555434000  | 4.455966000  | -0.596379000 |
| H | 6.392096000  | -2.229175000 | 1.452920000  |
| H | 4.041460000  | -2.060060000 | 2.845358000  |
| H | 6.043774000  | -4.028357000 | -0.567708000 |
| H | 3.471937000  | -4.930997000 | -0.441689000 |
| H | 2.250157000  | -3.765813000 | 1.693870000  |

## References

1. Led, J.J.; Gesmar, H. Application of the linear prediction method to NMR spectroscopy. *Chem. Rev.* **1991**, *91*, 1413–1426.
2. Yang, L.; Simionescu, R.; Lough, A.; Yan, H. Some observations relating to the stability of the BODIPY fluorophore under acidic and basic conditions. *Dyes Pigm.* **2011**, *91*, 264–267.
3. Weiss, R.; Grimes, R. N. Sources of Line Width in Boron-11 Nuclear Magnetic Resonance Spectra. Scalar Relaxation and Boron-Boron Coupling in  $B_4H_{10}$  and  $B_5H_9$ . *J. Am. Chem. Soc.* **1978**, *100*, 1401–1405.
